# Supplementary material
Source: Research Square preprint supplement (doi:10.21203/rs.3.rs-10321939/v1)
Supplement: Supplementary file 1 [file 13956add4778290e97f7c24e.docx]

**Supplementary Information**

**An allosteric pocket in KV1.3 defines a distinct chemical space for immunomodulator design**

Guoqing Luo1,2,#, Xin Zhang3,#, Huixin Xia1,2,#, Ziyue Wei1,2, Zheyang Zhang1,2, Jie Sun1,2, Zixuan Zhang1,2, Yi Peng1,2, Han Liu1,2, Xuemeng Huang1,2, Peng Cao4, Mingqiang Rong1,2,*, Ye Yu3,*, Cheng Tang1,2,*

1The National and Local Joint Engineering Laboratory of Animal Peptide Drug Development, College of Life Sciences, Hunan Normal University, Changsha 410081, China

2Peptide and small molecule drug R&D platform, Furong Laboratory, Changsha 410078, China

3Key Laboratory of Preclinical Study for New Drugs of Gansu Province, School of Basic Medical Sciences, Lanzhou University, Lanzhou, China

4Hospital of Integrated Traditional Chinese and Western Medicine, Nanjing University of Chinese Medicine, Nanjing 210023

#contributed equally to this work

*Correspondence should be addressed to: [rongmq@hunnu.edu.cn](mailto:rongmq@hunnu.edu.cn) (Mingqiang Rong), [yuye@cpu.edu.cn](mailto:yuye@cpu.edu.cn) (Ye Yu), or chengtang@hunnu.edu.cn (Cheng Tang)

**
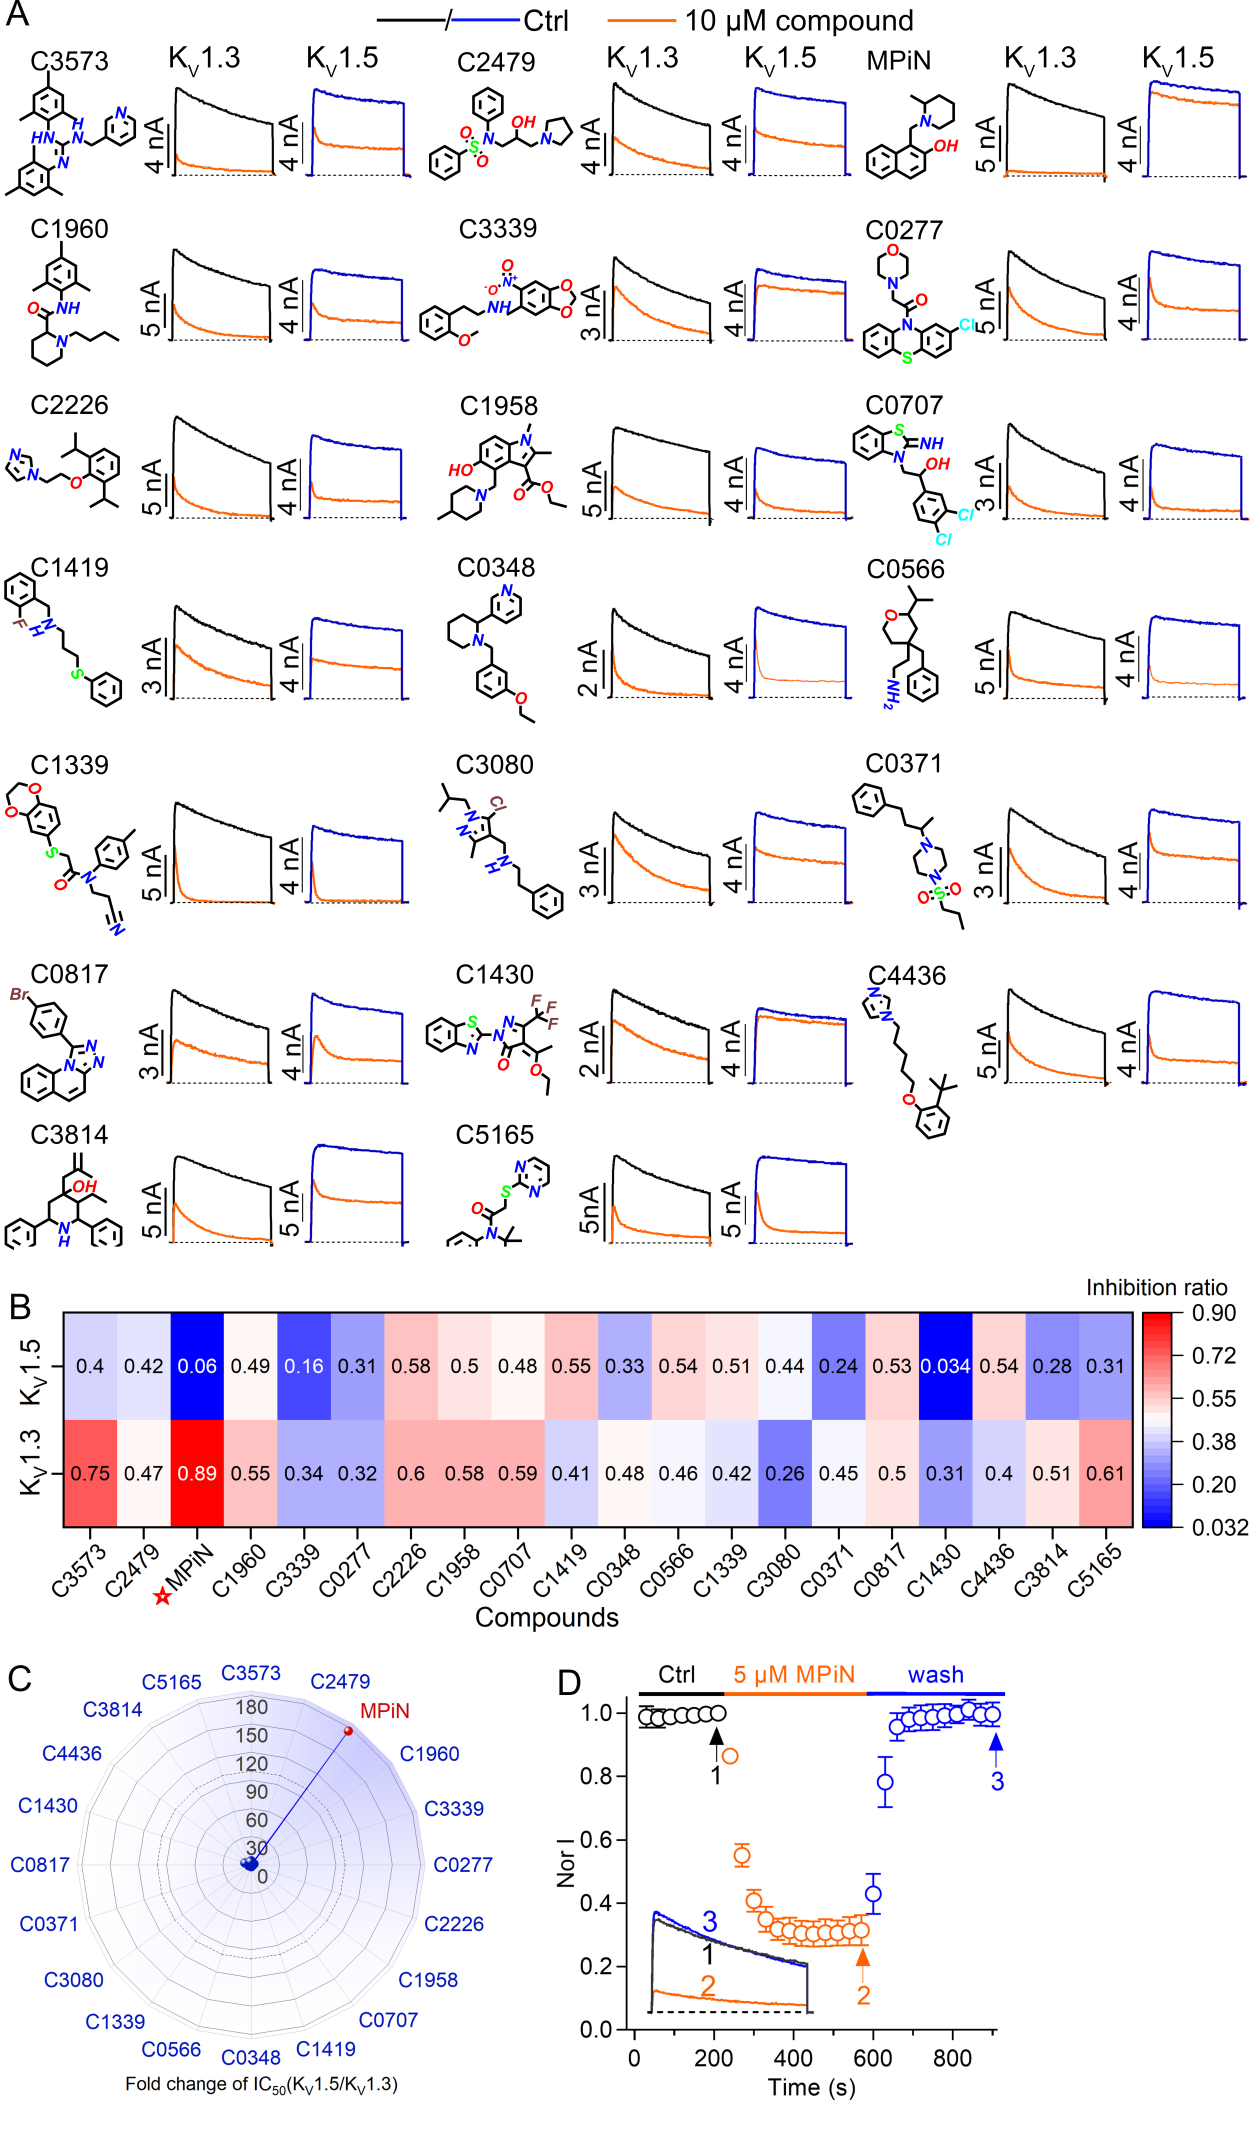
**

**Supplementary Figure 1.** (A) Typical KV1.3 and KV1.5 current traces before and after treatment with the indicated compounds, identified by screening KV1.3 inhibitors from a library containing 4,208 structurally diverse compounds (from Selleck Chemicals LLC, Catalog No. L3600) (n = 5). Currents were elicited using +40 mV/200 ms depolarizing pulses from a holding potential of -90 mV, with sweep intervals of 30 s. Compounds were applied by acute perfusion. (B) Heat map summarizing the compounds’ mean inhibition ratio on KV1.3 and KV1.5 currents, with the color scale (blue to red) representing low to high inhibition (n = 5). MPiN stood out for its potent inhibition of KV1.3 (0.89) with little effect on KV1.5 (0.06). (C) Fold increase in IC50 of inhibiting KV1.5 currents by the indicated compounds, relative to their respective IC50 against KV1.3. IC50 values were calculated from the inhibition ratios in (B) using a simplified Hill equation (n = 5).(D) Time course of inhibition of KV1.3 currents by acute perfusion of 5 μM MPiN and recovery upon washout, with inhibition and recovery time constants of 24.8 ± 5.5 s and 35.7 ± 3.9 s, respectively (n = 7). Currents were normalized to the maximum current before MPiN administration (Ctrl). Inset shows typical currents at indicated time points.


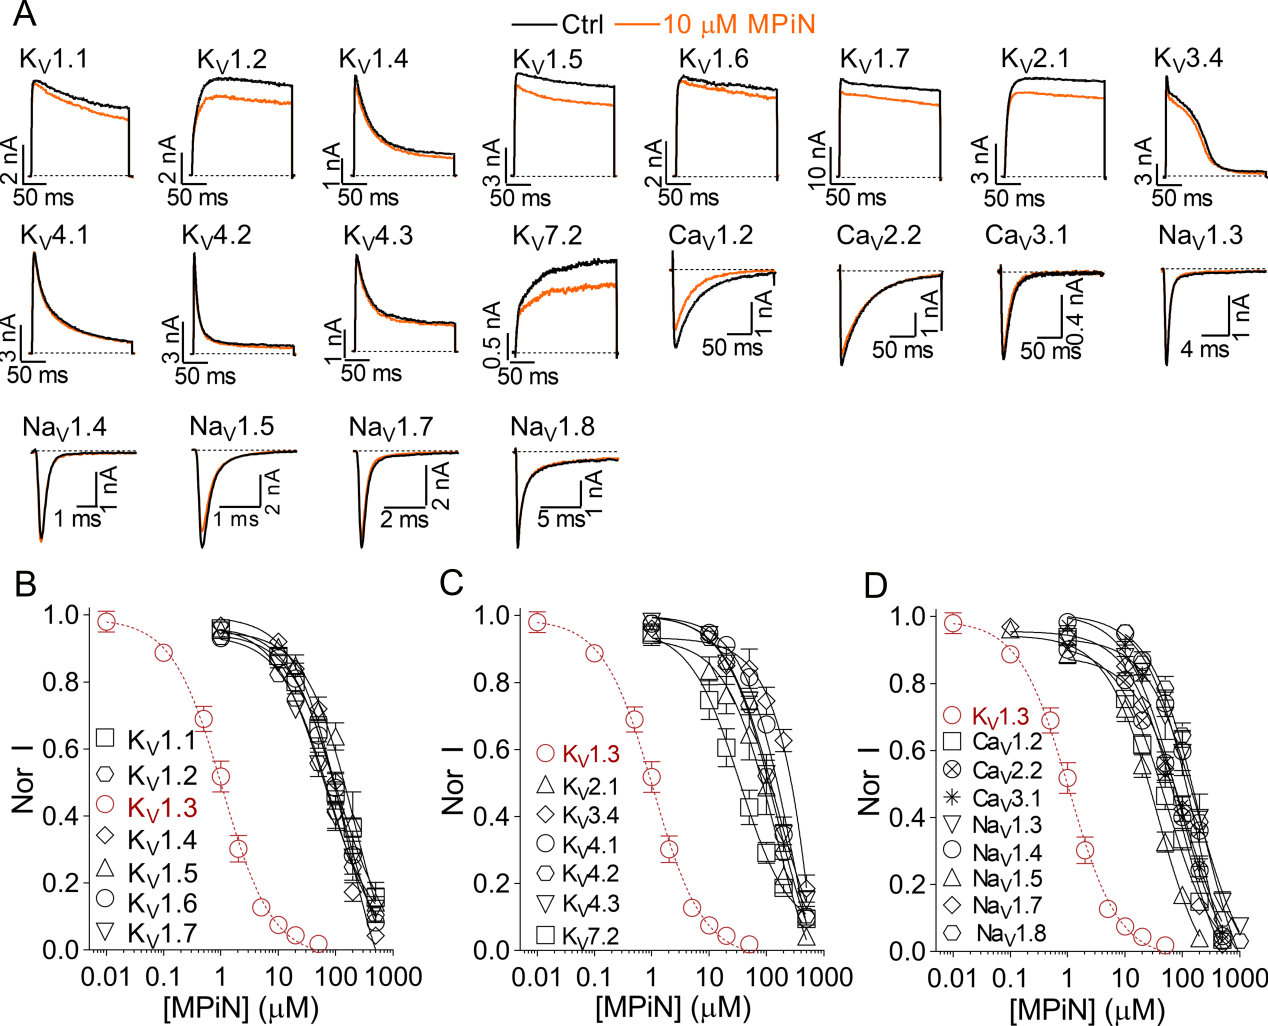


**Supplementary Figure 2. MPiN selectively inhibited the KV1.3 channel.** (A) Representative current traces showing the effects of MPiN (10 μM) on various KV, NaV, and CaV channels as illustrated (n = 5 - 9). (B) - (D) Dose-response relationships of MPiN inhibiting KV1.3 and the off-target channels in (A) (n = 5 - 9). Currents with various doses of MPiN treatment were normalized to control current (Nor I). The IC50 values were summarized in **Supplementary Table 1**.


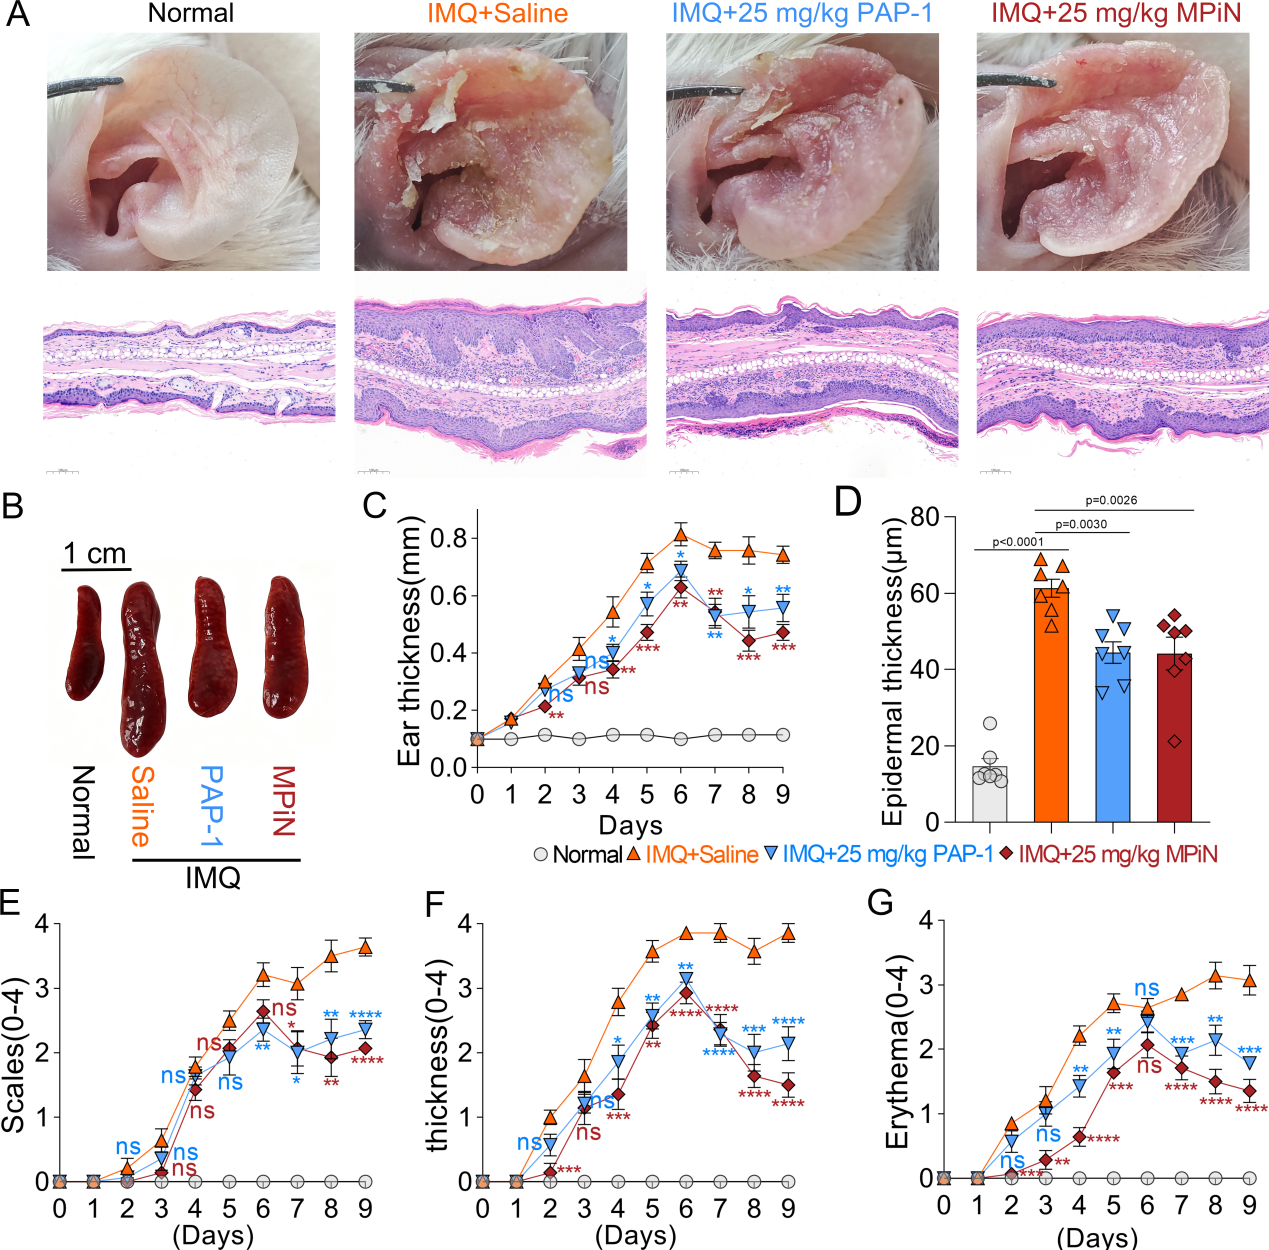


**Supplementary Figure 3. MPiN alleviated IMQ-induced psoriasis in mice, with efficacy comparable to PAP-1.** (A) Representative gross images of mouse ears (top) and H&E-stained ear sections (bottom) from day 9 (D9) mice (n = 7). (B) Representative spleen images for animals in each group (n = 7). (C) Time course of ear thickness during treatment (n = 7). (D) Quantification of epidermal thickness in ear sections from D9 mice (n = 7). (E-G) Psoriasis Area and Severity Index (PASI) scores over time. Scores for scaling (E), erythema (F), and ear thickening (G) were graded on a scale of 0–4 (n = 7). In (C-G), statistic differences evaluated using one-way ANOVA with post-hoc Dunnett's multiple comparisons test, refer to Supplementary table 2 for F, df, and exact p values (p values are as shown in panel D); *p < 0.05, **p < 0.01, ***p <0.001, and ****p < 0.0001.


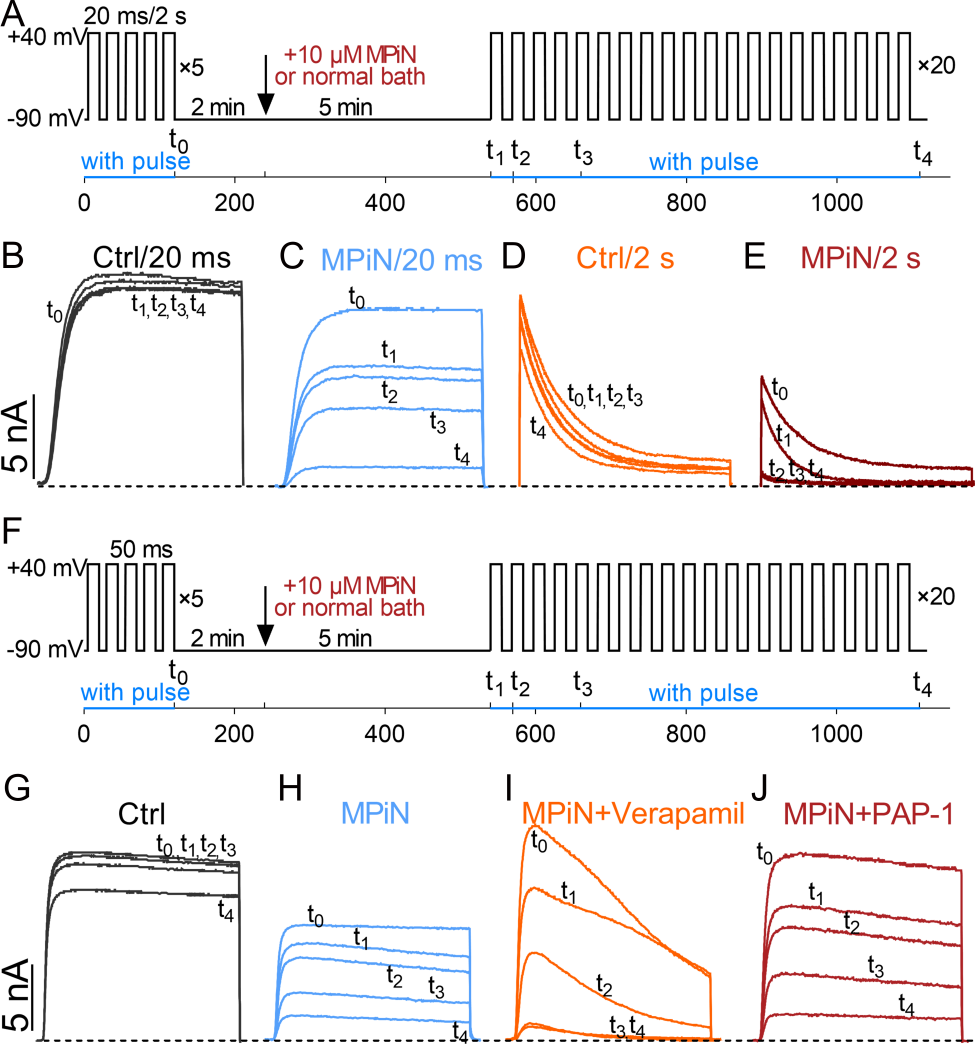


**Supplementary Figure 4.** (A) Voltage and drug perfusion protocols for analyzing the time course of KV1.3 currents inhibition by MPiN. Channels were held at -90 mV and activated by two sets of depolarizing pulse trains (consisting of +40 mV depolarizing pulses of 20 ms or 2 s), separated by a -90 mV/7 min holding pulse that trapped channels in the resting state. The timeline represents a cumulative sweep interval of 30 s, with t0-t4 indicating different time points along the time course. 10 μM MPiN was applied by acute perfusion 2 min into the holding pulse, and incubated with resting state channels for an additional 5 min (arrow) before depolarizing pulses were recovered. In the control group, normal bath solution was perfused instead. (B)-(E) Representative KV1.3 currents at the t0-t4 time points indicated in (A) (n = 8 - 12). (B, D) control group; (C, E) MPiN group. Currents were elicited by +40 mV pulses of 20 ms (B, C) or 2 s (D, E). (F) The same as in (A), with the exception of pulse duration of 50 ms. (G–J) Representative KV1.3 currents recorded at the t0–t4 time points indicated in (F) (n = 5 - 13). (G) Control; (H) MPiN; (I) Verapamil + MPiN; and (J) PAP-1 + MPiN. Verapamil (100 μM) and PAP-1 (200 nM) were applied by preincubation from the beginning of the experiment.

**
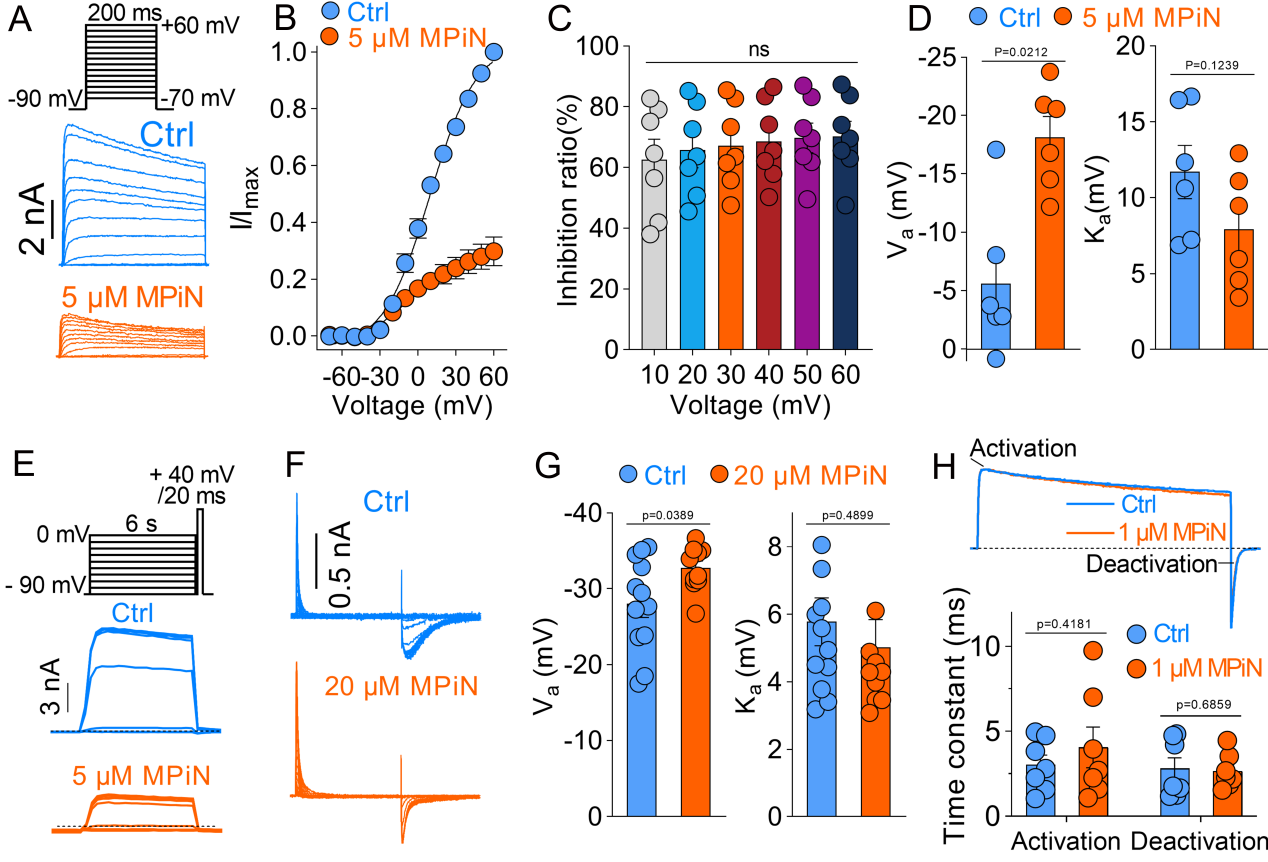
**

**Supplementary Figure 5.** (A) Representative KV1.3 currents before (blue) and after (orange) 5 μM MPiN treatment (n = 6). Currents were evoked by depolarizing pulses from -70 mV to +60 mV (in 10 mV increment), from -90 mV holding, with sweep intervals of 30 s. (B) Current-voltage (I - V) relationships from (A), with currents being normalized to the control current at +60 mV (n = 6). (C) Inhibition ratios across various depolarizing voltages in (B), showing voltage-independent inhibition by MPiN (n = 6); ns, not significant. (D) Summary of half-activation voltage (Va, left panel) and slope factor (Ka, right panel) for steady-state activation of KV1.3 channels before and after 5 μM MPiN treatment. Untreated: Va = -6.0 ± 1.3 mV, Ka = 12.5 ± 1.3 mV; treated: Va = -19.5 ± 0.9 mV, Ka = 6.4 ±0.8 mV. (E) Representative KV1.3 currents evoked using the classic two-pulses protocol shown, in the absence (blue) or presence (orange) of preincubated MPiN (5 μM) (n = 10 - 12). (F) Typical KV1.3 gating currents elicited by depolarizations from -60 mV to +40 mV (in 5 mV increments), under conditions without or with preincubated MPiN (20 μM) (n = 10 - 12). (G) Summary of Va (left panel) and Ka (right panel) for steady-state activation of KV1.3 gating currents in the absence and presence of 20 μM MPiN. Untreated: Va = -29.4 ± 1.0 mV, Ka = 7.7 ± 0.8 mV; treated: Va = -32.7 ± 0.5 mV, Ka = 4.5 ± 0.4 mV (n = 10 - 12). (H) Upper panel: representative KV1.3 currents before and after 1 μM MPiN treatment, each normalized to its own peak; Lower panel: activation and deactivation time constants calculated by fitting the current activation and deactivation processes, confirming no change in current kinetics. Untreated: τactivation =3.0 ± 0.5 ms, τdeactivation = 3.0 ± 0.6 ms; treated: τactivation = 4.1 ± 1.1 ms , τdeactivation = 2.8 ± 0.3 ms (n = 7). In (C), (D), (G), and (H), each dot represents a separate experimental cell. Statistical tests: (C) one-way ANOVA with post-hoc Tukey’s multiple comparison test; (D) and (H) paired t-test; (G) unpaired t-test. p values are as shown; refer to Supplementary table 2 for F, t, df, and exact p (C) values.


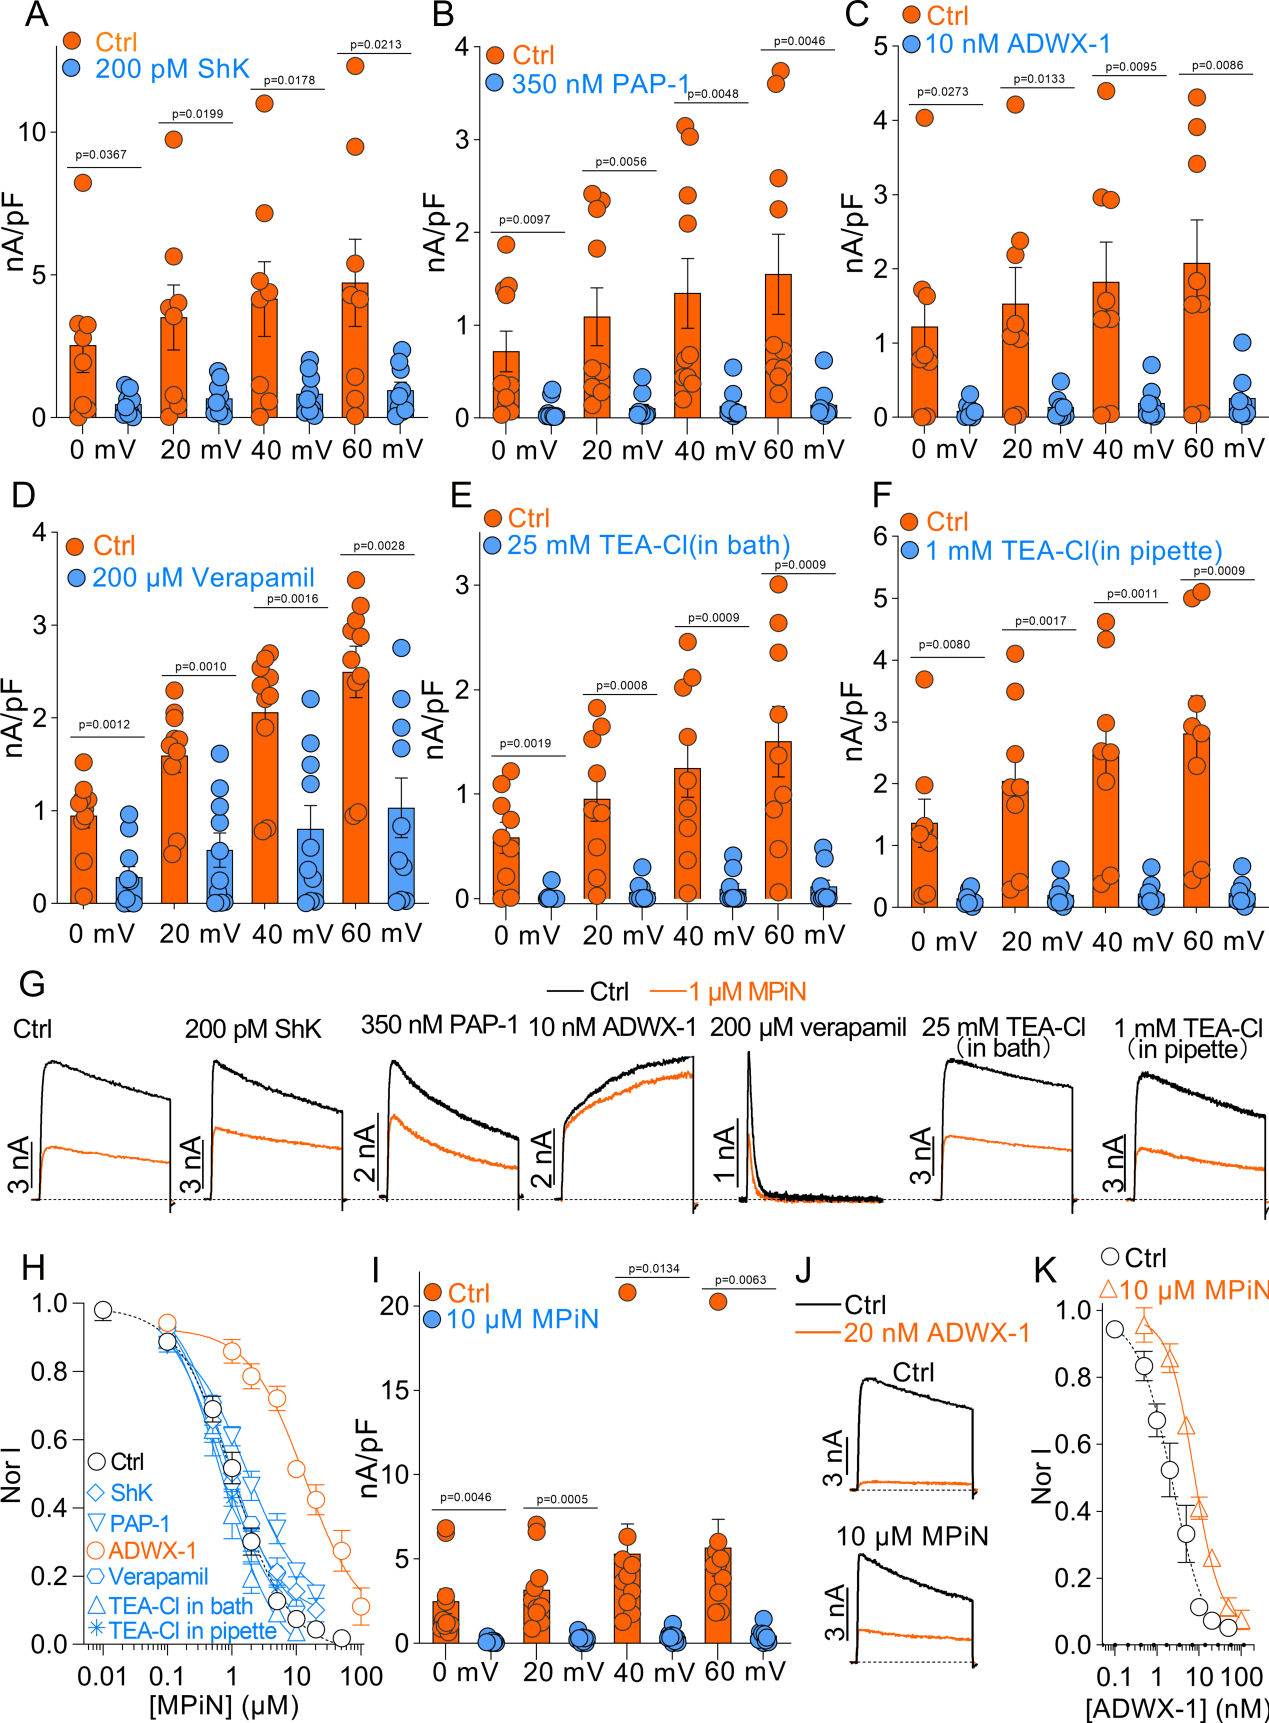


**Supplementary Figure 6.** (A-F) Current density of cells expressing KV1.3 channels across various depolarizing voltages, recorded without (Ctrl) or with bath preincubation of 200 pM ShK (A), 350 nM PAP-1 (B), 10 nM ADWX-1 (C), 200 μM verapamil (D), 25 mM TEA-Cl (E), or with 1 mM TEA-Cl in the pipette (F) (n = 8 - 10). (G) Representative current traces showing KV1.3 inhibition by 1 μM MPiN in the presence of the bath- or pipette-applied drugs shown in (A - F) (n = 8 - 10). (H) Dose-response relationships of MPiN inhibiting KV1.3 currents in the absence (Ctrl) or presence of preincubated drugs as indicated (n = 5 - 8). (I) Current density of KV1.3-expressing cells in the absence (Ctrl) or presence of 10 μM MPiN preincubation (n = 10). (J - K) Representative current traces (J) and concentration-response curves (K) for ADWX-1 inhibition of KV1.3 channels in the absence (Ctrl) or presence of MPiN preincubation (n = 8). The IC50 values were summarized in **Supplementary Table 1**. In (A - F) and (I), each dot represents a separate experimental cell; statistical differences assessed by unpaired t-test, p values are as shown; refer to Supplementary table 2 for t and df values.


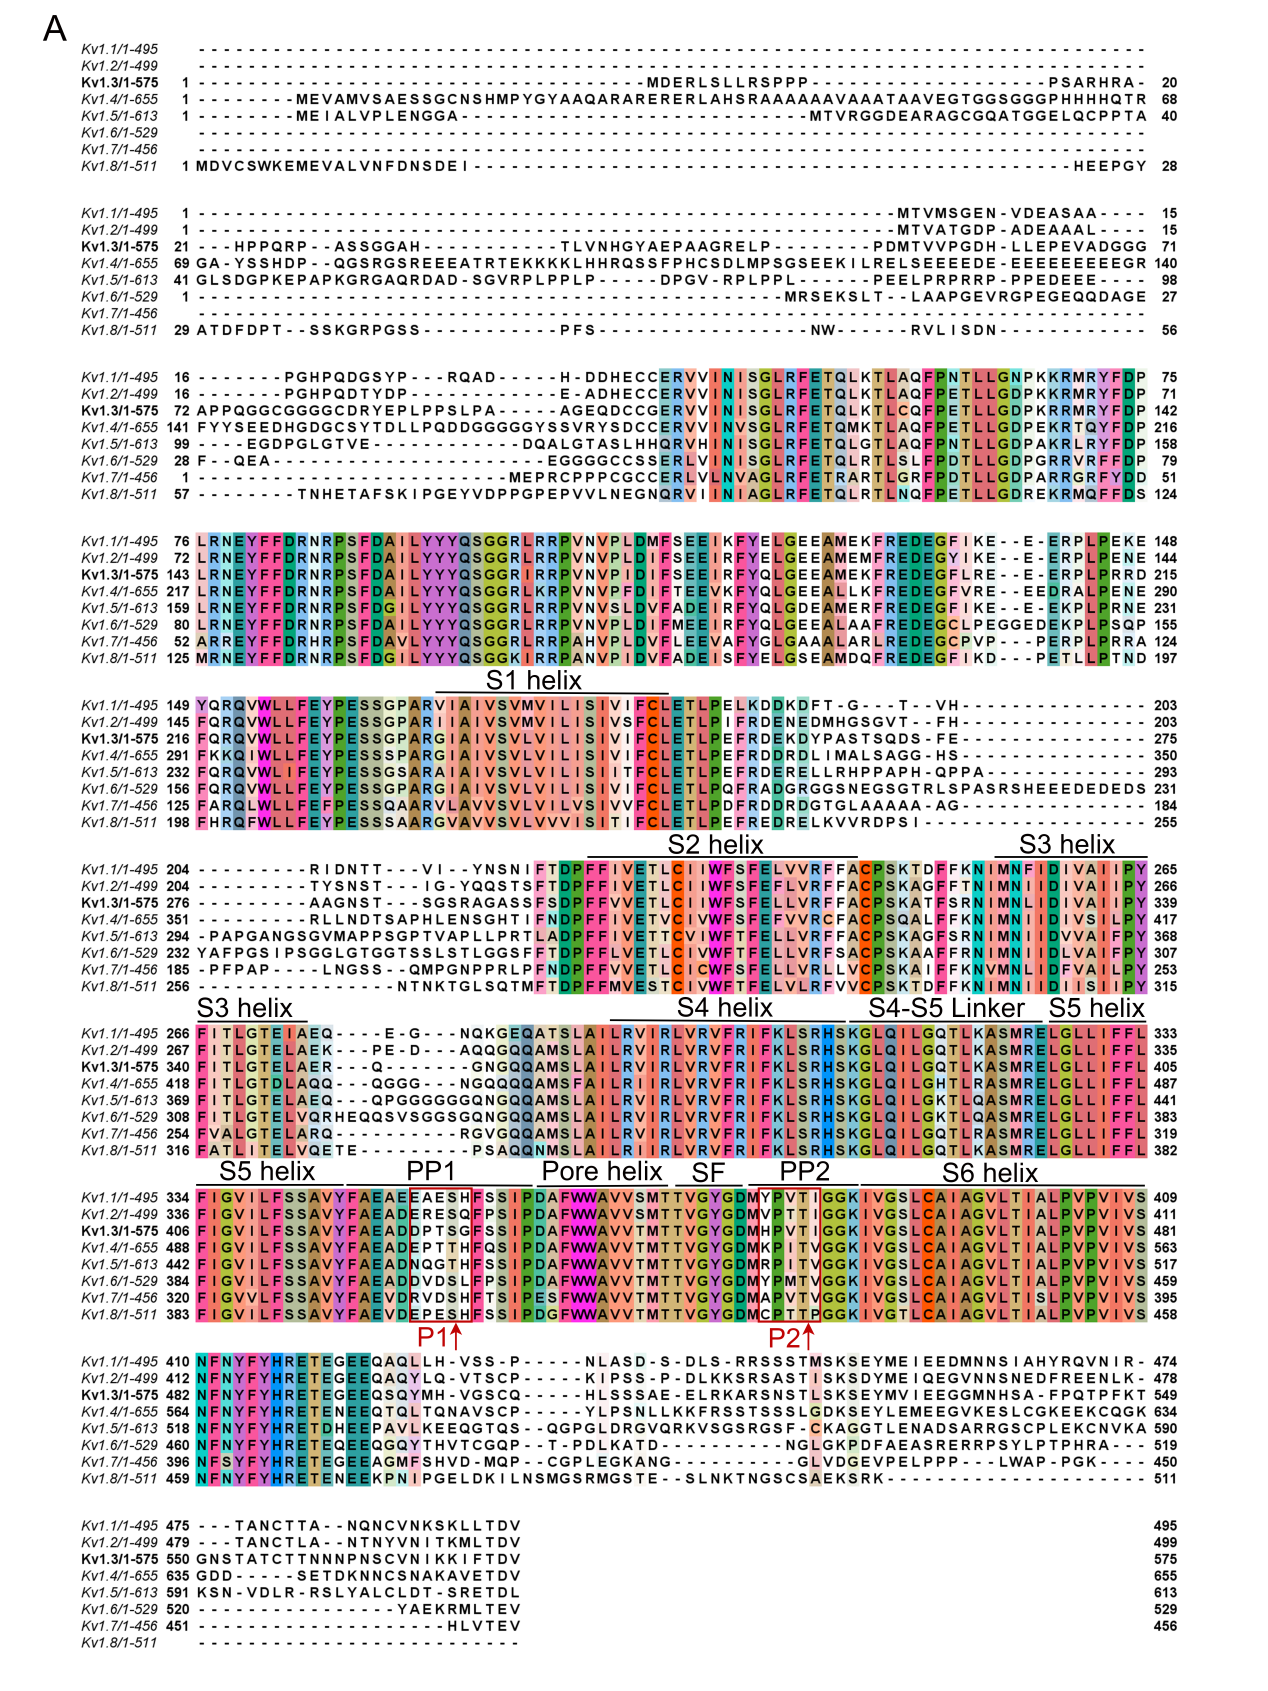


**Supplementary Figure 7.** Sequence alignment of KV1.x paralogs , with transmembrane helices S1-S6, the S4-S5 and S5-S6 linkers labeled. The S5-S6 linker comprises the S5-pore helix loop (PP1 loop), the pore helix, the selectivity filter (SF), and the SF-S6 loop (PP2 loop). Red boxes indicate two variable regions in PP1 and PP2 loops, designated as P1 and P2 segments, respectively.


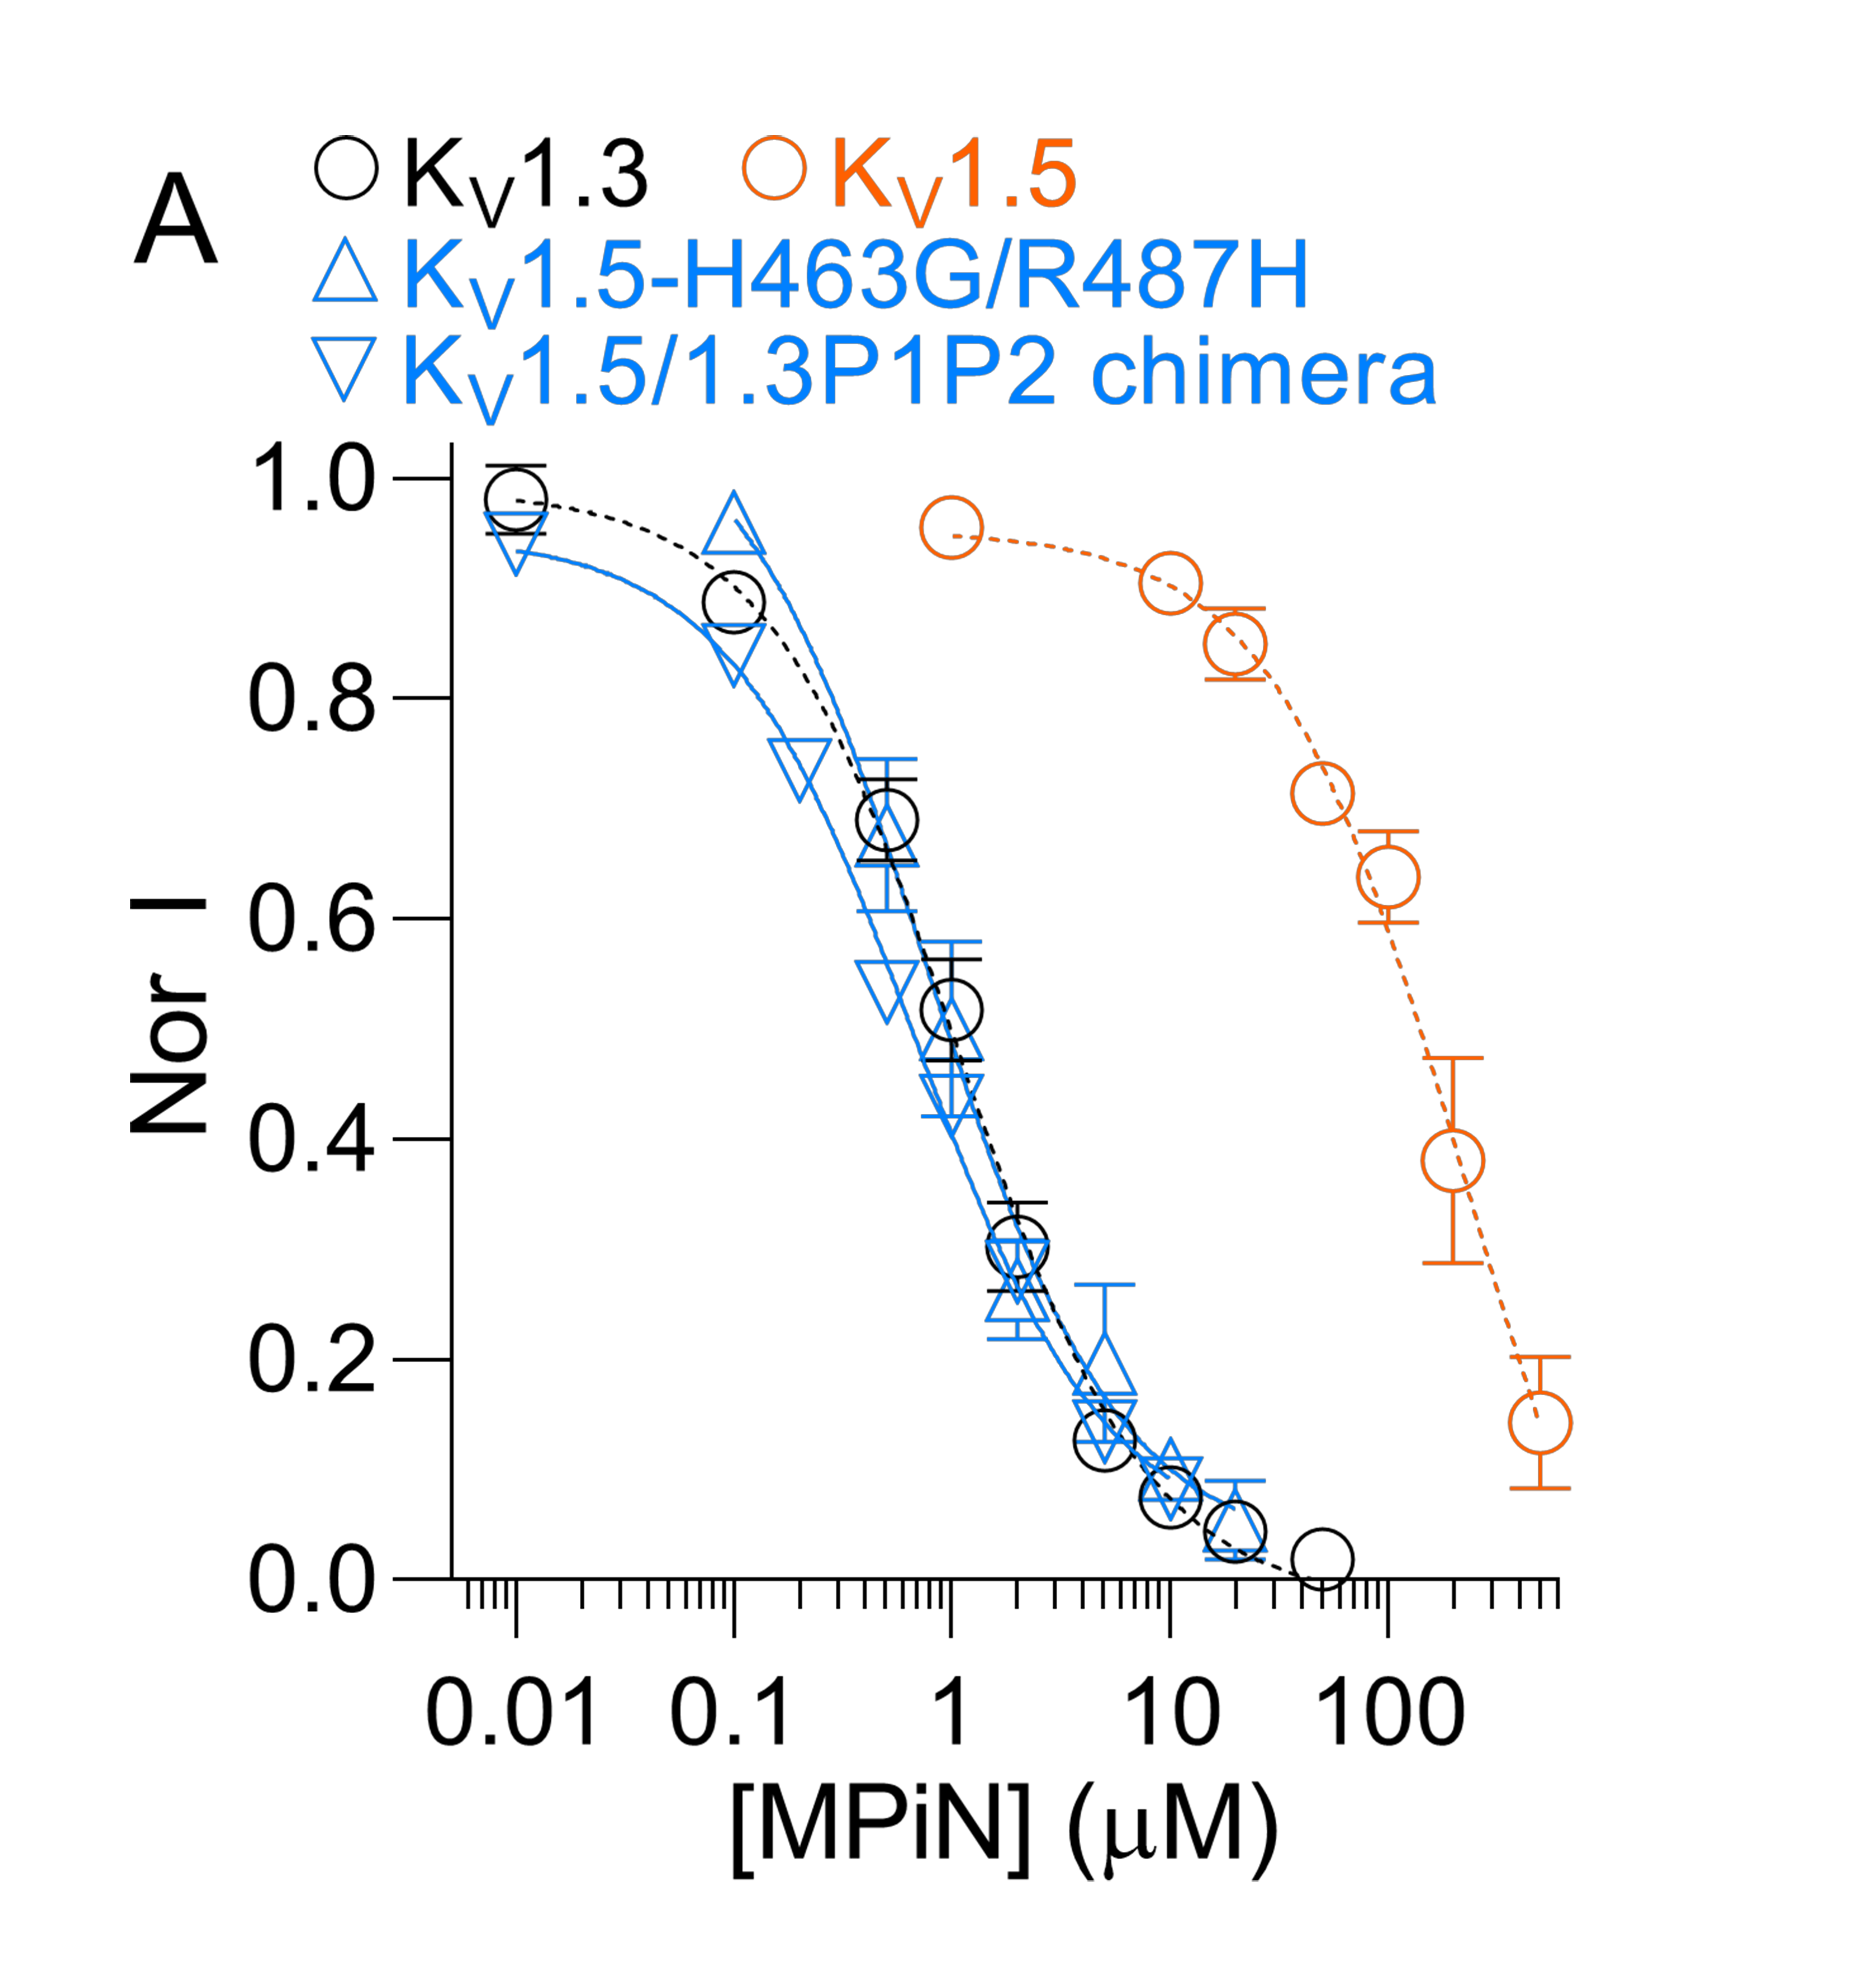


**Supplementary Figure 8.** Dose-response relationships of MPiN inhibiting the KV1.5/1.3P1P2 chimera and KV1.5-H463G/R487H mutant channels, with KV1.3 and KV1.5 shown as dashed lines for reference (n = 6 - 7). The IC50 values were summarized in **Supplementary Table 1**.

**
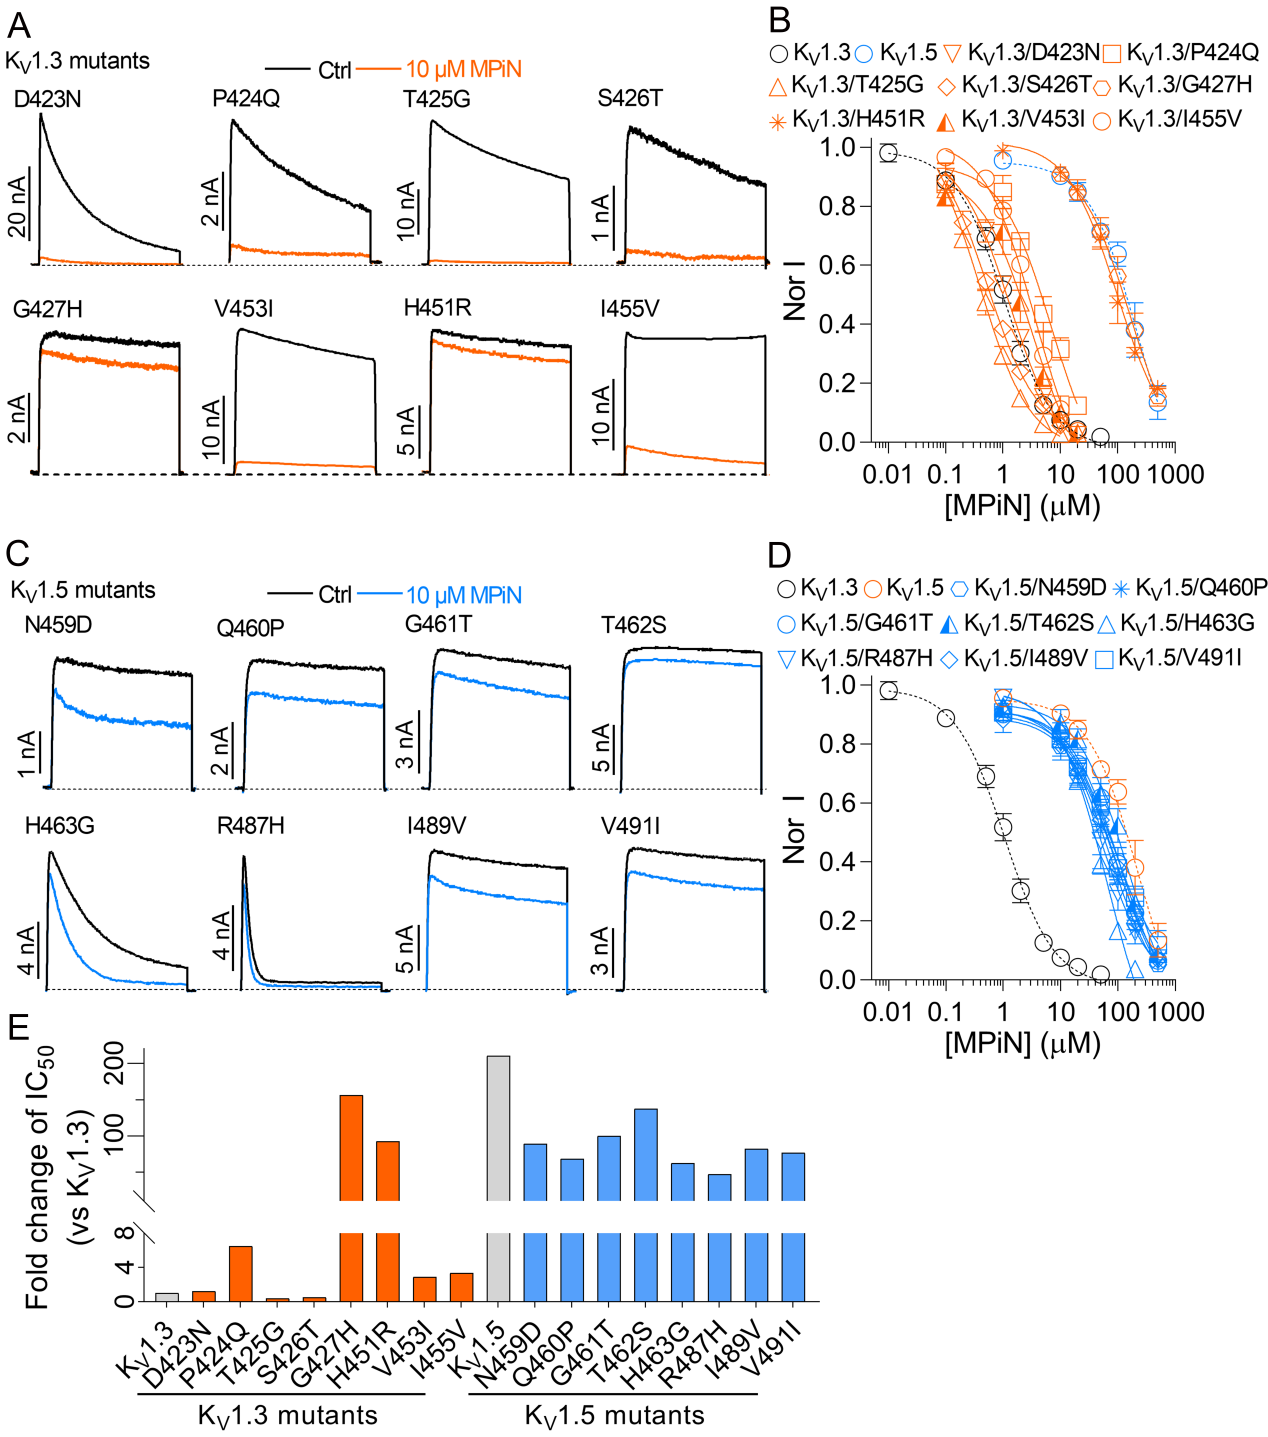
**

**Supplementary Figure 9.** (A) and (C) Representative current traces showing inhibition by 10 μM MPiN of (A) KV1.3- and (C) KV1.5-derived mutant channels, constructed using scanning mutagenesis to exchange variable residues in their P1 and P2 segments (n = 5 - 9). (B) and (D) Dose-response relationships for MPiN inhibition of indicated (B) KV1.3- and (D) KV1.5-derived mutant channels; wild-type KV1.3 and KV1.5 channels were shown as dashed lines for reference (n = 5 - 9). The IC50 values were summarized in **Supplementary Table 1**. (E) Fold change in IC50 for MPiN inhibiting the indicated mutant channels relative to wild-type KV1.3 (n = 5 - 9).


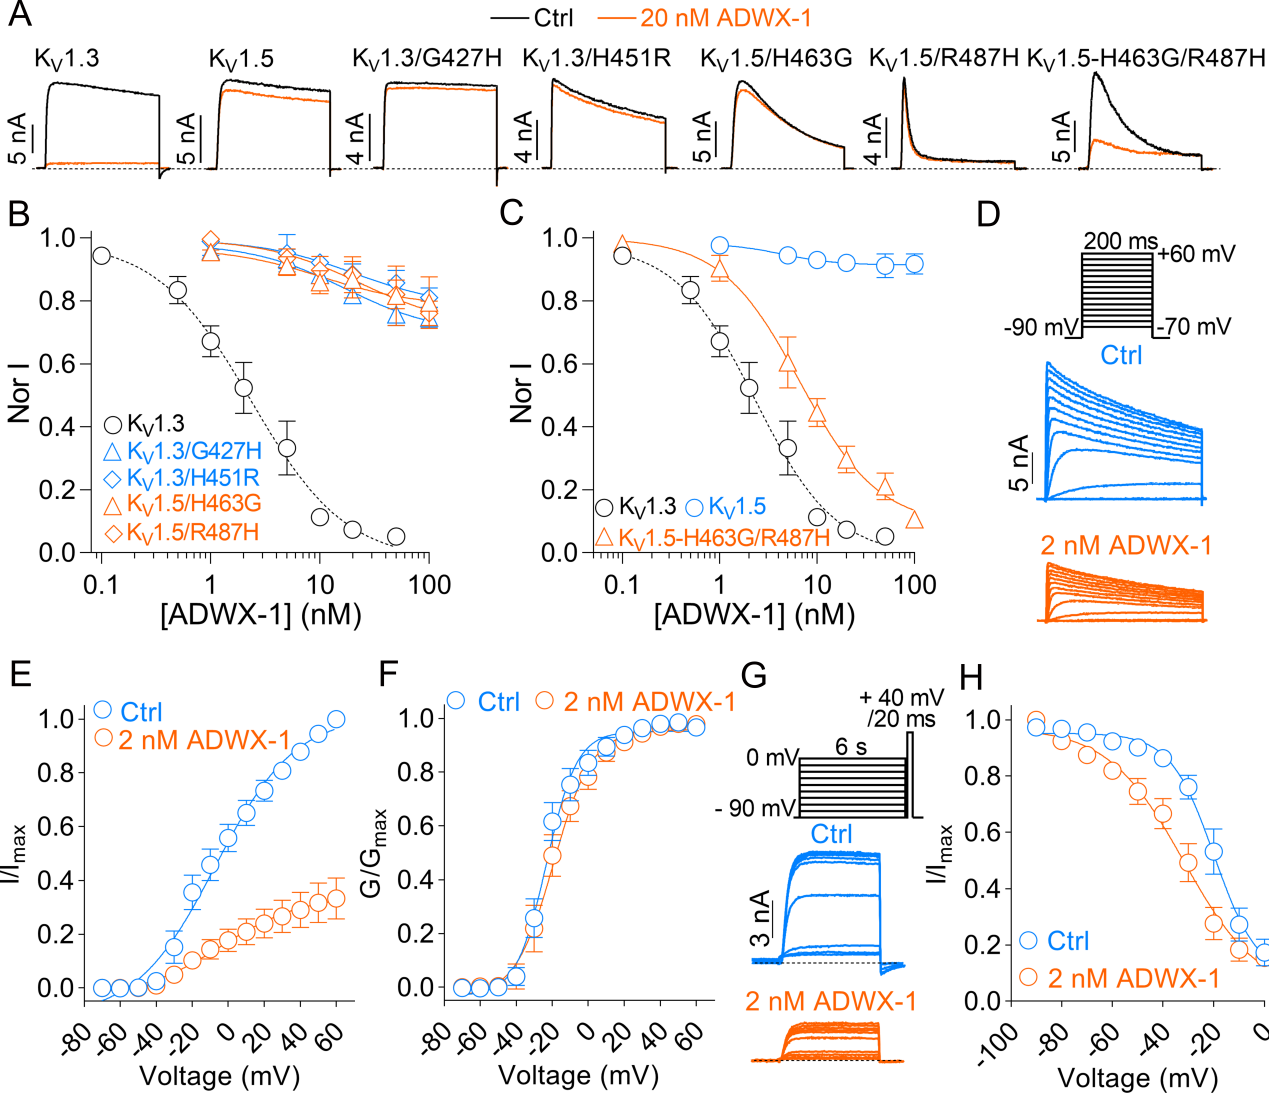


**Supplementary Figure 10.** (A-C) Representative current traces (A) and dose-response relationships (B, C) showing inhibition of KV1.3, KV1.5, KV1.3/G427H, KV1.3/H451R, KV1.5/H463G, KV1.5/R487H, and KV1.5-H463G/R487H channels by ADWX-1 (n = 5 - 9). Substitution of G427 or H451 in KV1.3 with the corresponding KV1.5 residues (H463 and R487, respectively) drastically reduced ADWX-1 sensitivity. Conversely, ADWX-1 sensitivity was restored only by the double reverse mutation (H463G/R487H) in KV1.5. IC50 values were summarized in **Supplementary Table 1**. (D) Representative KV1.3 currents recorded before (blue) and after (orange) 2 nM ADWX-1 treatment (n = 10). Currents were elicited by depolarizing steps from -70 to +60 mV in 10-mV increments from a holding potential of -90 mV, with sweep intervals of 30 s. (E, F) Current-voltage (I - V; E) and conductance-voltage (G - V; F) relationships of KV1.3 channels under the conditions shown in (D). In (E), currents were normalized to the control current at +60 mV (I/Imax). In (F), conductance values were normalized to the maximal conductance of each condition (G/Gmax). (G) Representative KV1.3 currents evoked using the two-pulse protocol shown, in the absence (blue) or presence (orange) of 2 nM ADWX-1 preincubation (n = 10). (H) Steady-state fast inactivation curves of KV1.3 channels under the conditions shown in (G). The half-inactivation voltage (Vh) and slope factor (Kh) were -19.8 ± 2.5 mV and -8.6 ± 1.8 mV, and -31.8 ± 3.9 mV and -15.0 ± 3.6 mV, for ADWX-1 untreated and treated channels, respectively (n = 10).


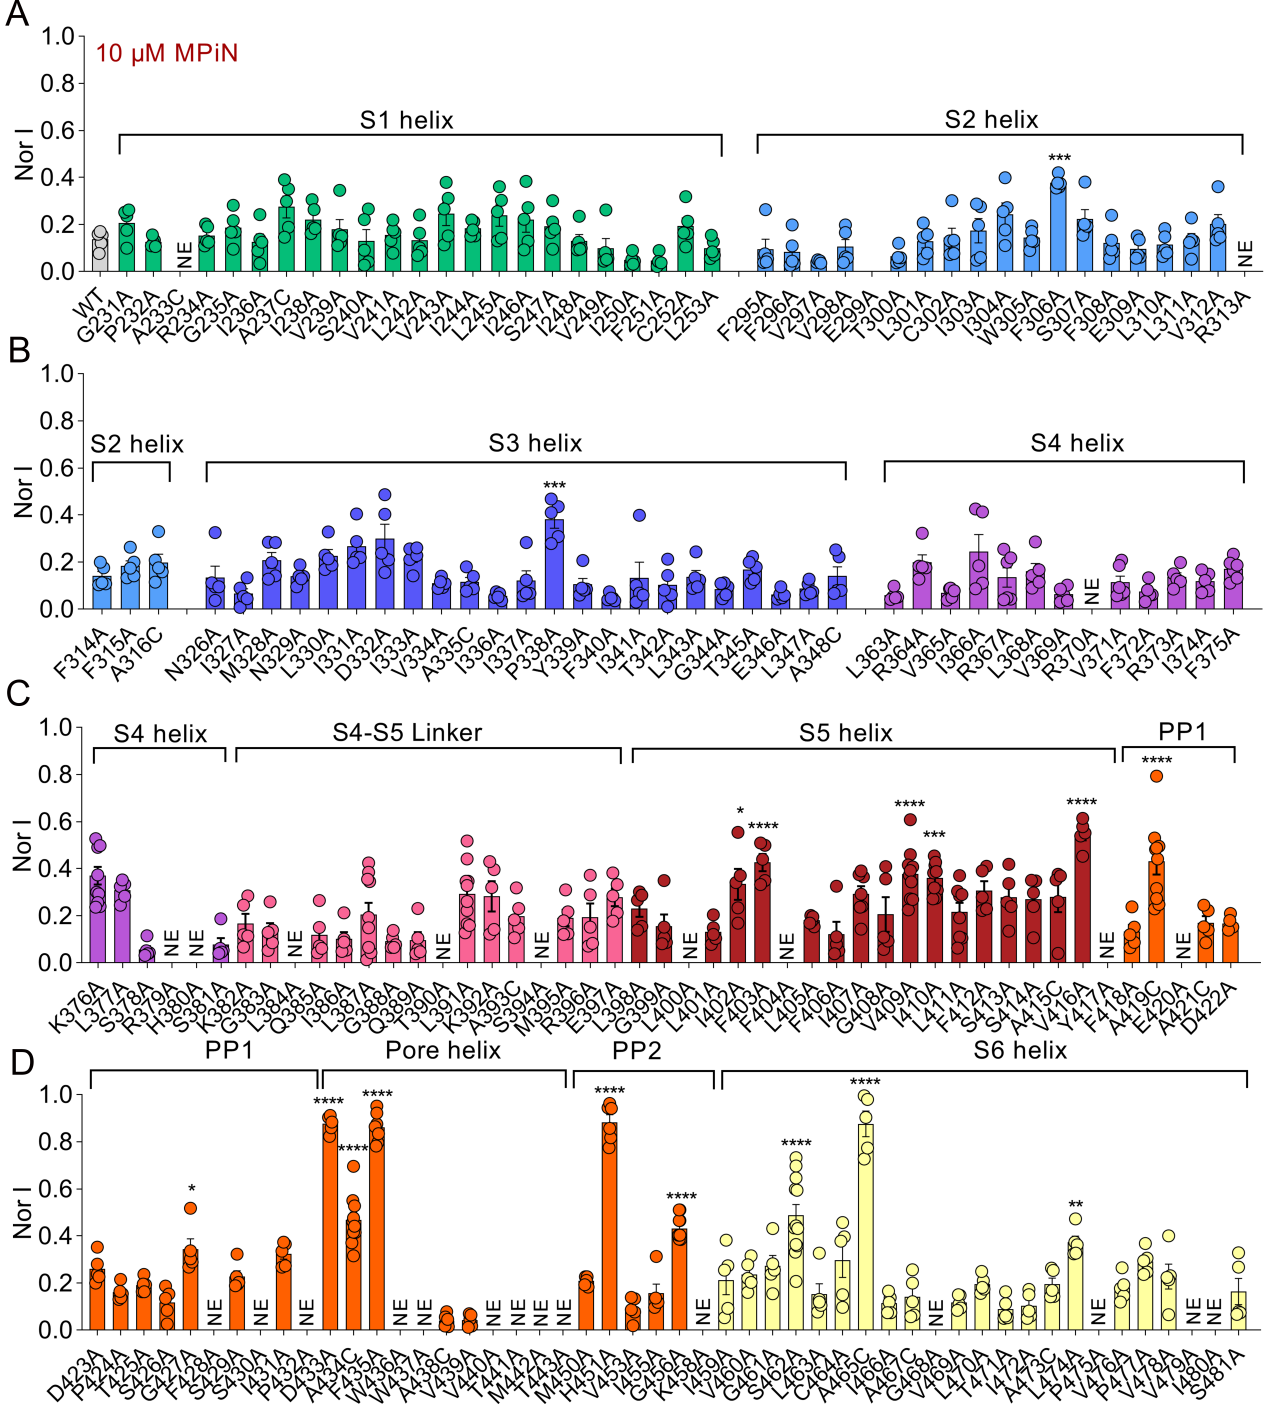


**Supplementary Figure 11.** Summary of normalized residual current ratios after 10 μM MPiN treatment for KV1.3 mutants generated by alanine-scanning mutagenesis (or cysteine substitution for native alanine residues) across the full-length KV1.3 sequence, excluding the N- and C-terminal intracellular loops and the S1-S2 and S3-S4 extracellular linkers (n = 5 - 10). Statistics: one-way ANOVA with post-hoc Dunnett's multiple comparison test (vs wild-type KV1.3); *p < 0.05; ***p < 0.001; ****p < 0.0001; refer to Supplementary table 2 for F, df, and exact p values.

**

**

**Supplementary Figure 12.** (A-C) Representative current traces (A) and dose-response curves (B-C) showing MPiN inhibition of KV1.3 mutant channels identified by alanine/cysteine-scanning mutagenesis as critical for MPiN activity (Supplementary Figure 11). n = 5-7. Wild-type KV1.3 is shown in dashed line for comparison. IC50 values are summarized in **Supplementary Table 1**. (D-E) Representative current traces (D) and summary of normalized residual current ratio (Ires; E) showing inhibition by 20 nM ADWX-1 of MPiN-critical mutant channels. Wild-type KV1.3 served as a reference. Each dot in (E) represents an individual cell (n = 5 - 8); significance was assessed by one-way ANOVA with post-hoc Dunnett’s multiple comparison test; ****p<0.0001; refer to Supplementary table 2 for F, df, and p values. Note Ires values determined in (E) were used to calculate IC50s of ADWX-1 against KV1.3 and KV1.3 mutant channels based on the simplified Hill equation: IC50 = [X]/(1/Ires - 1), in which [X] was the ADWX-1 concentration. The calculated ADWX-1 IC50 for KV1.3 (2.9 ± 0.8 nM) was nearly identical to that obtained from the dose-response curve (2.3 ± 0.6 nM).

**
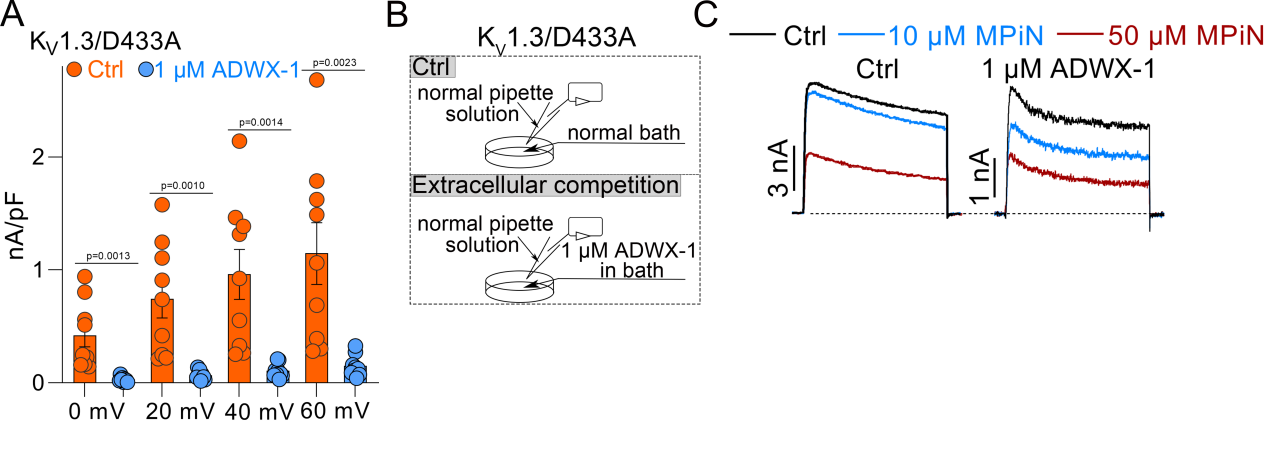
**

**Supplementary Figure 13.** (A) Current density-voltage relationships of cells expressing KV1.3/D433A mutant channels in the absence or presence of 1 μM ADWX-1 preincubation, showing robust channel inhibition. Each dot represents a separate experimental cell (n = 9 - 10). Statistics: unpaired t-test; p values are as shown; refer to Supplementary table 2 for t and df values. (B) Schematic of drug competition assay analyzing the influence of preincubated ADWX-1 on MPiN potency against the KV1.3/D433A mutant channel. (C) Representative current traces of MPiN inhibiting the KV1.3/D433A mutant channel in the absence or presence of bath-applied ADWX-1 (n = 5 - 6).


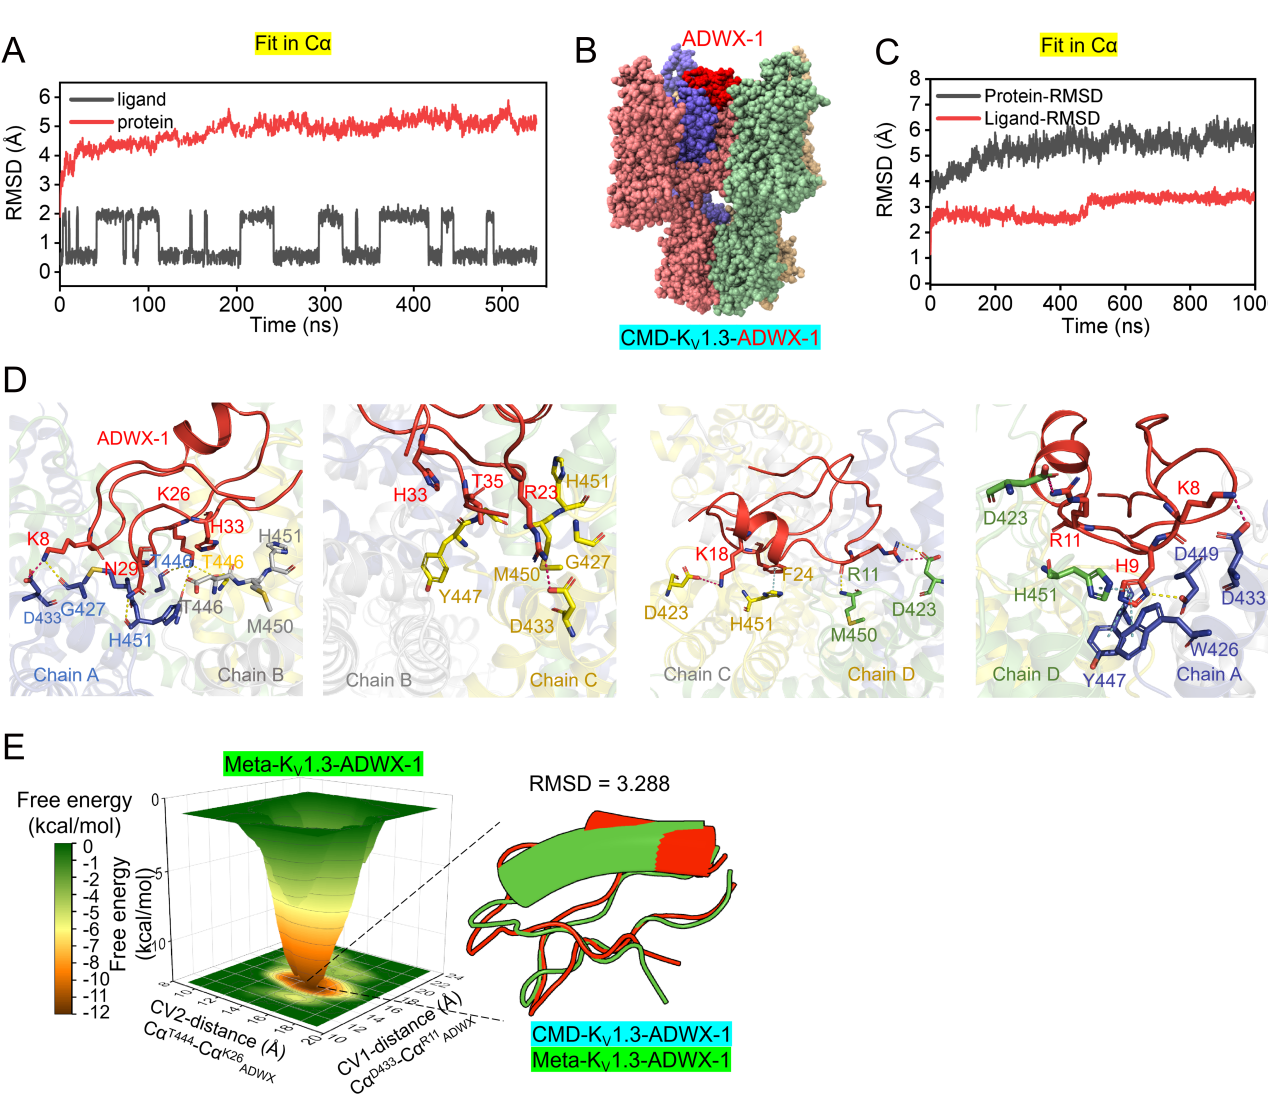


**Supplementary Figure 14.** **Binding of ADWX-1 to KV1.3 as observed by CMD and MetaD.** **(A)** RMSD plots of the ligand and protein during CMD simulation of the KV1.3–MPiN complex. **(B)** Front view of the three-dimensional complex of ADWX-1 bound to KV1.3. **(C)** RMSD plots of the ligand and protein during MetaD simulation of the ADWX-1-MPiN complex. **(D)** Detailed molecular structure of the protein–ligand interactions between ADWX-1 and KV1.3. **(E)** Conformation of the ADWX-1-KV1.3 complex at the lowest free energy, as revealed by MetaD simulations.

**
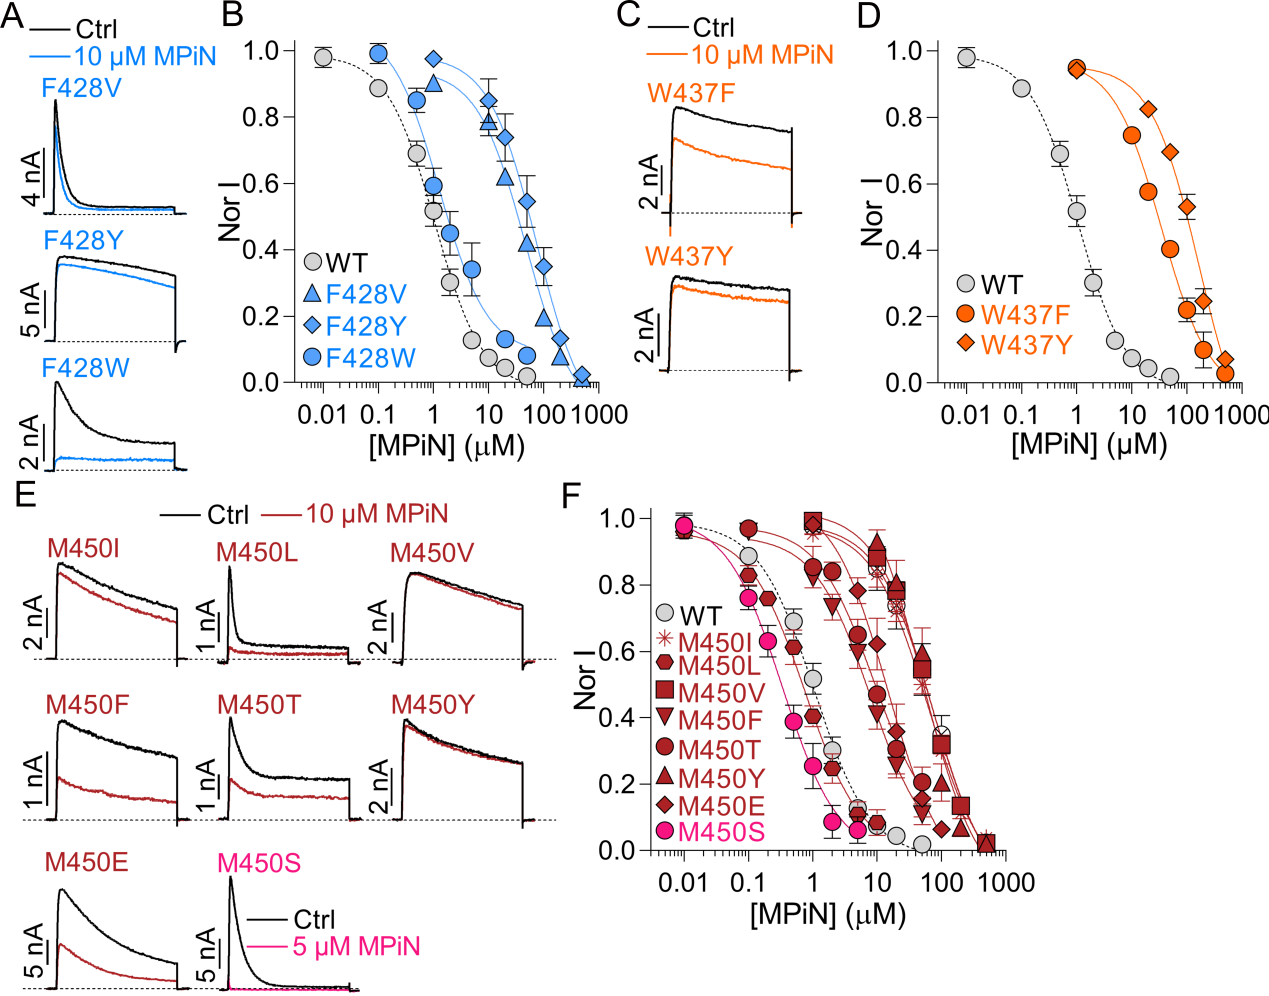
**

**Supplementary Figure 15.** Representative current traces (A, C, E) and concentration-response relationships (B, D, F) of MPiN inhibiting mutant channels generated by multiple-attribute mutations of the F428 (A-B), W437 (C-D), and M450 (E-F) residues in KV1.3 (n = 5 - 7). IC50 values were summarized in **Supplementary Table 1**.


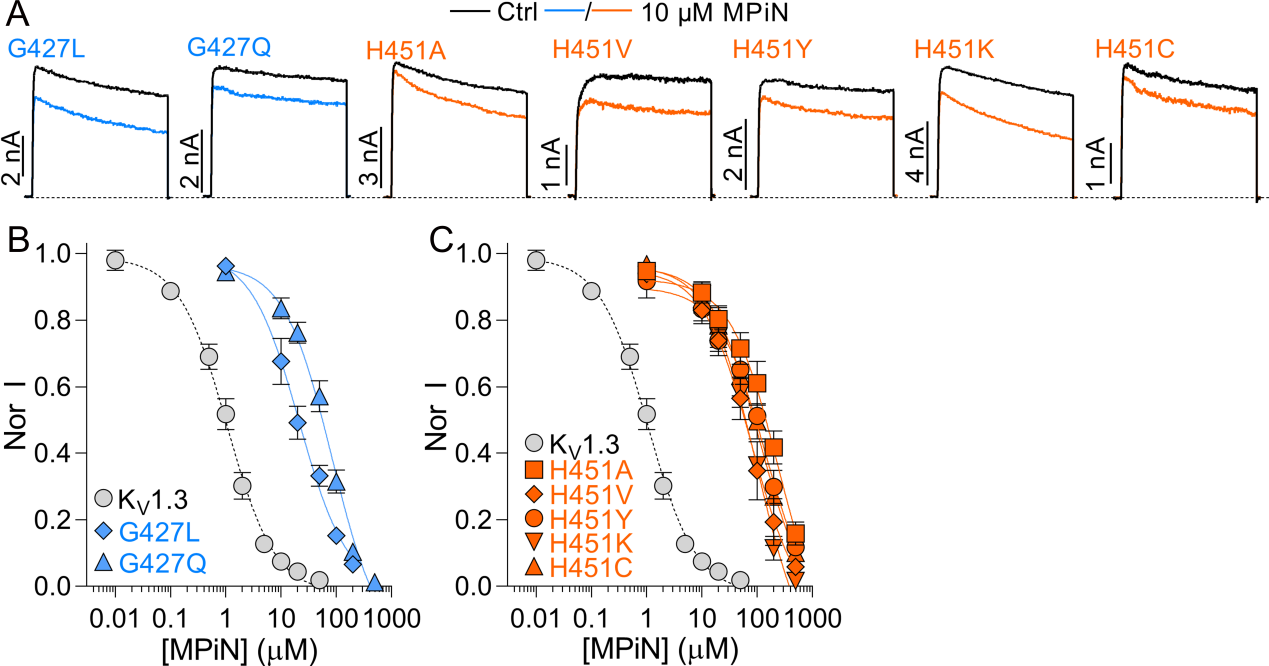


**Supplementary Figure 16.** (A) Representative current traces showing 10 μM MPiN inhibition of KV1.3 mutants, in which Gly427 (G427) or His451 (H451) was substituted with corresponding residues from KV1.1-1.2, KV1.4, or KV1.6-1.8 (n = 6 - 7). (B-C) Dose-response curves for MPiN inhibition of the (B) G427 and (C) H451 mutants, with wild-type KV1.3 and KV1.5 shown as dashed lines for reference (n = 6 - 7). The IC50 values were summarized in **Supplementary Table 1**.

**
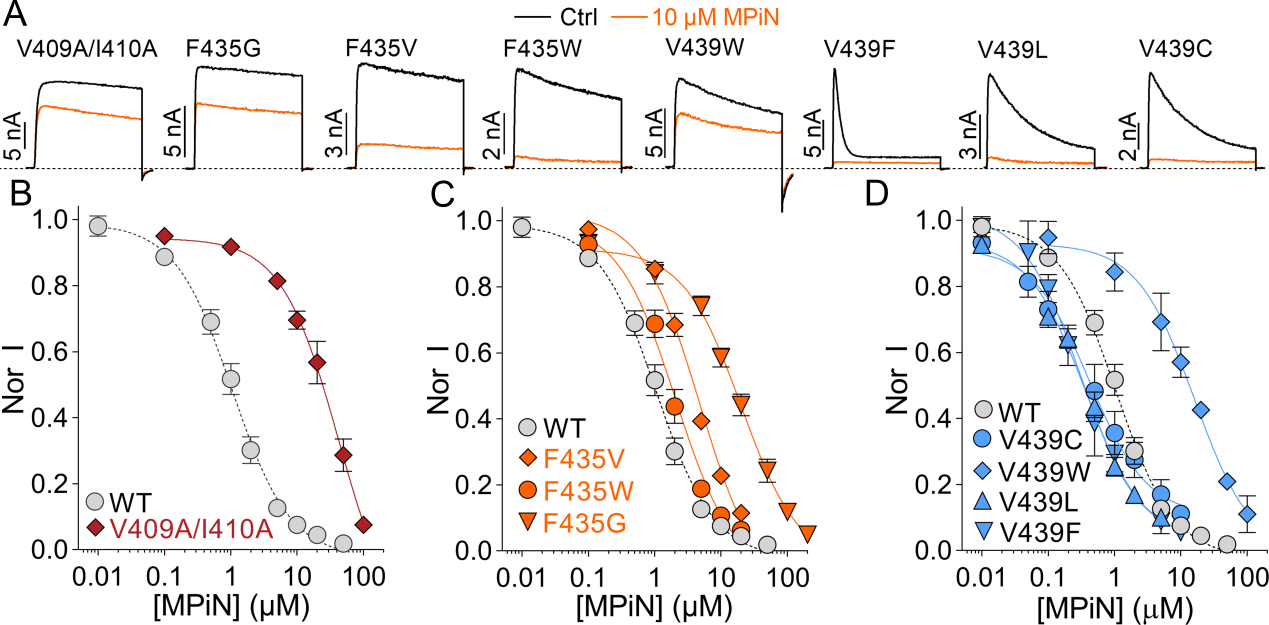
**

**Supplementary Figure 17.** Representative current traces (A) and concentration-response curves (B-D) showing MPiN inhibition of KV1.3 mutants bearing substitutions at residues along the identified allosteric propagation pathway (V409, I410, F435, and V439), with wild-type KV1.3 included for comparison (n = 6 - 10). IC50 values are summarized in **Supplementary Table 1**.


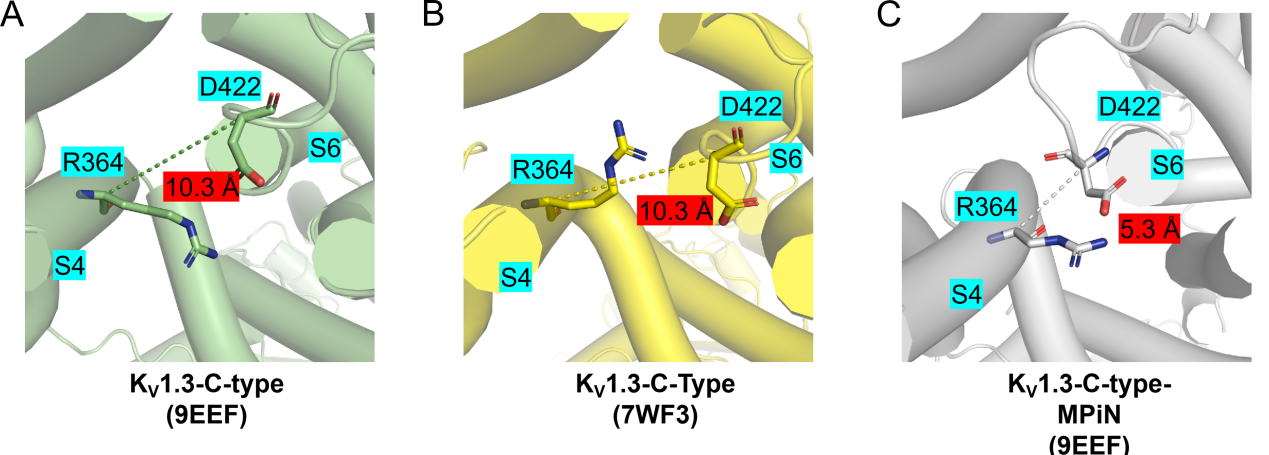


**Supplementary Figure 18.** **Interactions between residues in the S4 and S5 helices of KV1.3 in distinct functional states. (A–C)** Shown are the interaction patterns and inter‑residue distances between R364 (S4) and D422 (S5) for KV1.3 in the Apo C-Type inactivated state (A-B), and the MPiN‑bound C-Type inactivated state (C), respectively.

**Supplementary Table 1**

Summary of IC50 values reported in this study

| **Figures** | **Channel** | **IC50 (μM)** | **n** | **Fold change of IC50**  **(*vs* KV1.3)** |
| --- | --- | --- | --- | --- |
| Fig.1B | KV1.3（-90 mV holding） | 1.05 ± 0.1 | 12 | 1 |
| KV1.3（-35 mV holding） | 0.6 ± 0.1 | 7 | 0.55 |
| Fig.1C/SFig.2 | KV1.1 | 101.2 ± 16.3 | 9 | 96.1 |
| KV1.2 | 79.5 ± 13.5 | 6 | 75.5 |
| KV1.4 | 150.6 ± 23.2 | 6 | 142.9 |
| KV1.5 | 225.1 ± 64.6 | 6 | 213.7 |
| KV1.6 | 135.0 ± 23.6 | 5 | 128.2 |
| KV1.7 | 63.4 ± 12.0 | 6 | 60.2 |
| KV2.1 | 144.0 ± 46.6 | 8 | 136.7 |
| KV3.4 | 336.6 ± 6.8a | 5 | 319.7 |
| KV4.1 | 306.2 ± 48.4 | 6 | 290.7 |
| KV4.2 | 151.4 ± 17.6 | 6 | 143.8 |
| KV4.3 | 142.2 ± 28.7 | 6 | 135 |
| KV7.2 | 33.9 ± 7.4 | 5 | 32.1 |
| NaV1.3 | 186.9 ± 48.1 | 5 | 177.4 |
| NaV1.4 | 199.2 ± 39.5 | 6 | 189.2 |
| NaV1.5 | 36.3 ± 5.2 | 7 | 34.4 |
| NaV1.7 | 91.9 ± 12.6 | 6 | 87.2 |
| NaV1.8 | 210.9 ± 34.4 | 7 | 199.3 |
| CaV1.2 | 54.3 ± 8.8 | 5 | 51.5 |
| CaV2.2 | 110.5 ± 21.5 | 6 | 104.9 |
| CaV3.1 | 81.8 ± 11.1 | 5 | 77.7 |
| Fig.3C/SFig.6H | KV1.3(with 200 pM ShK in bath) | 0.7 ± 0.2 | 7 | 0.7 |
| KV1.3(with 350 nM PAP-1 in bath) | 1.7 ± 0.4 | 6 | 1.6 |
| KV1.3(with 10 nM ADWX-1 in bath) | 13.3 ± 3.1 | 8 | 12.7 |
| KV1.3(with 200 μM verapamil in bath) | 0.9 ± 0.1 | 5 | 0.8 |
| KV1.3(with 25 mM TEA-Cl in bath) | 0.7 ± 0.2 | 6 | 0.7 |
| KV1.3(with 1 mM TEA-Cl in pipette) | 0.7 ± 0.1 | 6 | 0.7 |
| Fig.3D/SFig.6K | KV1.3 | 0.0023 ± 0.0006 | 8 | 1.0 |
| KV1.3(with 10 μM MPiN in bath) | 0.0076 ± 0.0009 | 8 | 3.3 |
| Fig.3F/SFig.8 | KV1.5/1.3 P1P2 chimera | 0.7 ± 0.1 | 7 | 0.6 |
| KV1.5-H463G/R487H | 0.8 ± 0.2 | 6 | 0.7 |
| Fig.3F/SFig.10C | KV1.5-H463G/R487H | 0.0066 ± 0.0014 | 9 | 2.9 |
| KV1.5 | >0.1 | 8 | >100 |
| Fig.4A  (upper panel)/SFig.12B-C | KV1.3/F306A | 8.7 ± 2.2 | 6 | 8.2 |
| KV1.3/I402A | 5.9 ± 1.3 | 5 | 5.6 |
| KV1.3/F403A | 12.5 ± 3.0 | 7 | 11.8 |
| KV1.3/V409A | 5.8 ± 0.9 | 5 | 5.5 |
| KV1.3/I410A | 4.5 ± 0.7 | 5 | 4.3 |
| KV1.3/V416A | 25.7 ± 9.5 | 7 | 24.4 |
| KV1.3/A419C | 13.7 ± 3.3 | 6 | 13.0 |
| KV1.3/G427A | 8.6 ± 0.9 | 5 | 8.1 |
| KV1.3/D433A | 111.7 ± 30.9 | 6 | 106.1 |
| KV1.3/A434C | 11.9 ± 3.0 | 6 | 11.3 |
| KV1.3/F435A | 81.1 ± 19.0 | 7 | 77.0 |
| KV1.3/G456A | 8.8 ± 1.8 | 5 | 8.3 |
| KV1.3/S462A | 13.7 ± 3.4 | 7 | 13.0 |
| KV1.3/A465C | 84.2 ± 16.0 | 5 | 80.0 |
| KV1.3/L474A | 6.3 ± 1.5 | 6 | 6.0 |
| Fig.4A  ( lower panel)/SFig.12E | KV1.3 | 0.0029 ± 0.0008a | 5 | 1.0 |
| KV1.3/F306A | 0.0079 ± 0.0005a | 5 | 2.7 |
| KV1.3/I402A | 0.0056 ± 0.0004a | 5 | 1.9 |
| KV1.3/F403A | 0.0095 ± 0.0005a | 5 | 3.2 |
| KV1.3-V409A/I410A | 0.0166 ± 0.0016a | 5 | 5.6 |
| KV1.3/V416A | 0.0055 ± 0.0008a | 5 | 1.9 |
| KV1.3/A419C | 0.0012 ± 0.0002a | 5 | 0.4 |
| KV1.3/G427A | 0.0201 ± 0.0016a | 6 | 6.8 |
| KV1.3/D433A | 0.3211 ± 0.0008a | 5 | 109.0 |
| KV1.3/A434C | 0.0031 ± 0.0007a | 5 | 1.1 |
| KV1.3/F435A | 0.0025 ± 0.0004a | 6 | 0.8 |
| KV1.3/G456A | 0.0033 ± 0.0006a | 5 | 1.1 |
| KV1.3/S462A | 0.0012 ± 0.0001a | 5 | 0.4 |
| KV1.3/A465C | 0.0034 ± 0.0004a | 8 | 1.2 |
| KV1.3/L474A | 0.0064 ± 0.0009a | 5 | 2.2 |
| Fig.4C | KV1.3/D433A | 41.8 ± 4.4 | 5 | 39.7 |
| KV1.3/D433A(with 1 μM ADWX-1 in bath) | 40.4 ± 9.1 | 6 | 38.4 |
| Fig.4H/SFig.16B,D,F | KV1.3/F428Y | 74.6 ± 24.2 | 7 | 70.8 |
| KV1.3/F428V | 46.7 ± 5.9 | 5 | 44.3 |
| KV1.3/F428W | 1.3 ± 0.4 | 5 | 1.2 |
| KV1.3/W437Y | 166.1 ± 28.1 | 7 | 157.7 |
| KV1.3/W437F | 34.6 ± 4.1 | 6 | 32.8 |
| KV1.3/M450S | 0.3 ± 0.1 | 6 | 0.3 |
| KV1.3/M450Y | 50.8 ± 14.9 | 6 | 48.2 |
| KV1.3/M450T | 8.8 ± 2.4 | 7 | 8.3 |
| KV1.3/M450E | 14.7 ± 4.2 | 6 | 14.0 |
| KV1.3/M450F | 7.8 ± 1.7 | 6 | 7.4 |
| KV1.3/M450L | 0.8 ± 0.1 | 7 | 0.7 |
| KV1.3/M450V | 69.5 ± 6.6 | 6 | 65.9 |
| KV1.3/M450I | 61.6 ± 8.1 | 6 | 58.4 |
| Fig.5J/SFig.15B-C | KV1.3/G427L | 21.3 ± 6.1 | 6 | 20.3 |
| KV1.3/G427Q | 84.3 ± 14.1 | 7 | 80.1 |
| KV1.3/H451A | 240.1 ± 80.3 | 6 | 228.0 |
| KV1.3/H451V | 79.1 ± 20.1 | 6 | 75.1 |
| KV1.3/H451Y | 144.3 ± 34.9 | 6 | 137.0 |
| KV1.3/H451K | 100.4 ± 20.4 | 6 | 95.3 |
| KV1.3/H451C | 113.7 ± 26.3 | 6 | 108.0 |
| Fig.6E/SFig.17B-D | KV1.3-V409A/I410A | 43.1 ± 9.1 | 6 | 40.9 |
| KV1.3/F435W | 2.1 ± 0.4 | 6 | 2.0 |
| KV1.3/F435V | 4.8 ± 0.7 | 7 | 4.5 |
| KV1.3/F435G | 20.1 ± 2.7 | 7 | 19.1 |
| KV1.3/V439L | 0.4 ± 0.1 | 6 | 0.3 |
| KV1.3/V439W | 16.2 ± 4.9 | 6 | 15.3 |
| KV1.3/V439C | 0.4 ± 0.1 | 10 | 0.4 |
| KV1.3/V439F | 0.3 ± 0.1 | 8 | 0.3 |
| SFig.9B | KV1.3/D423N | 1.3 ± 0.2 | 7 | 1.3 |
| KV1.3/T425G | 0.4 ± 0.1 | 6 | 0.4 |
| KV1.3/S426T | 0.5 ± 0.1 | 5 | 0.5 |
| KV1.3/G427H | 166.9 ± 57.1 | 6 | 158.4 |
| KV1.3/H451R | 99.2 ± 30.8 | 9 | 94.2 |
| KV1.3/V453I | 3.1 ± 1.0 | 7 | 2.9 |
| KV1.3/P424Q | 6.9 ± 2.8 | 6 | 6.6 |
| KV1.3/I455V | 3.6 ± 0.9 | 5 | 3.4 |
| SFig.9D | KV1.5/H463G | 66.9 ± 16.3 | 8 | 63.6 |
| KV1.5/R487H | 50.4 ± 13.5 | 7 | 47.8 |
| KV1.5/I489V | 88.0 ± 15.9 | 6 | 83.6 |
| KV1.5/N459D | 95.0 ± 24.2 | 6 | 90.2 |
| KV1.5/T462S | 147.0 ± 37.3 | 6 | 139.6 |
| KV1.5/Q460P | 73.4 ± 11.5 | 7 | 69.6 |
| KV1.5/G461T | 107.0 ± 23.2 | 7 | 101.6 |
| KV1.5/V491I | 82.0 ± 17.1 | 6 | 77.8 |

aEstimated from a simplified Hill equation; all other IC50 values were determined by fitting the concentration-response curve.

**Supplementary Table 2**

Statistical parameters in this study

| **Figure** | **Analysis** | **F, t, df, p values** | **p value** |
| --- | --- | --- | --- |
| Fig.1E | one-way ANOVA with post-hoc Dunnett's multiple comparisons test | F (2, 18) = 19.54; p<0.0001 | Day 2: IMQ+Saline *vs* IMQ+PAP-1, p=0.0184; IMQ+Saline *vs* IMQ+MPiN, p<0.0001 |
| F (2, 18) = 4.704;  p=0.0227 | Day 3: IMQ+Saline *vs* IMQ+PAP-1, p=0.4022; IMQ+Saline *vs* IMQ+MPiN, p=0.0131 |
| F (2, 18) = 22.63;  p<0.0001 | Day 4: IMQ+Saline *vs* IMQ+PAP-1, p=0.0042; IMQ+Saline *vs* IMQ+MPiN, p<0.0001 |
| F (2, 18) = 11.91;  p=0.0005 | Day5: IMQ+Saline *vs* IMQ+PAP-1, p=0.0031; IMQ+Saline *vs* IMQ+MPiN, p=0.0004 |
| F (2, 18) = 18.06;  p<0.0001 | Day6: IMQ+Saline *vs* IMQ+PAP-1, p=0.0011; IMQ+Saline *vs* IMQ+MPiN, p<0.0001 |
| F (2, 18) = 19.72; p<0.0001 | Day7: IMQ+Saline *vs* IMQ+PAP-1, p<0.0001; IMQ+Saline *vs* IMQ+MPiN, p<0.0001 |
| F (2, 18) = 20.75; p<0.0001 | Day8: IMQ+Saline *vs* IMQ+PAP-1, p=0.0004; IMQ+Saline *vs* IMQ+MPiN, p<0.0001 |
| F (2, 18) = 48.89; p < 0.0001 | Day 9: IMQ+Saline *vs* IMQ+PAP-1, p<0.0001; IMQ+Saline *vs* IMQ+MPiN, p<0.0001 |
| Fig.1F | one-way ANOVA with post-hoc Dunnett's multiple comparisons test | F (3, 24) = 38.69;  p<0.0001 | IMQ+Saline *vs* Normal, p<0.0001; MQ+Saline *vs* IMQ+PAP-1, p<0.0001; IMQ+Saline *vs* IMQ+MPiN, p=0.0070 |
| Fig.1G | one-way ANOVA with post-hoc Dunnett's multiple comparisons test | F (3, 24) = 22.22;  p<0.0001 | IMQ+Saline *vs* Normal, p <0.0001; IMQ+Saline *vs* IMQ+PAP-1, p<0.0001; IMQ+Saline *vs* IMQ+MPiN, p<0.0001 |
| Fig.2E | one-way ANOVA with Tukey's multiple comparisons test | F (2, 23) = 42.22;  p<0.0001 | Ctrl *vs* Inactivated state, p=0.3620; Ctrl *vs* Open&Inactivated state, p<0.0001; Inactivated state *vs* Open&Inactivated state, p<0.0001 |
| Fig.2F | one-way ANOVA with Tukey's multiple comparisons test | F (2, 23) = 243.3; p<0.0001 | Ctrl *vs* Inactivated state, p<0.0001; Ctrl *vs* Open&Inactivated state, p<0.0001; Inactivated state *vs* Open&Inactivated state, p=0.8153 |
| Fig.2K(right upper panel) | ratio paired t test | +40 mV: t (5)=14.56; 0 mV: t (5)=7.536; -30 mV: t (5)=4.722 | +40 mV: Ctrl *vs* 20 µM MPiN, p<0.0001; 0 mV: Ctrl *vs* 20 µM MPiN, p=0.0007; -30 mV: Ctrl *vs* 20 µM MPiN, p=0.0052 |
| Fig.2K(right lower panel) | ratio paired t test | +40 mV: t (5)=0.09403; 0 mV: t (5)=2.604; -30 mV: t (5)=5.050 | +40 mV: Ctrl *vs* 20 µM MPiN, p=0.9287; 0 mV: Ctrl *vs* 20 µM MPiN, p=0.0480; -30 mV: Ctrl *vs* 20 µM MPiN, p=0.0039 |
| Fig.4K | Welch ANOVA with Dunnett's T3 multiple comparisons test | W (2.0, 12.80) = 15.30; p=0.0004 | +50 mV: Ctrl(-MTSET/-DTT) *vs* +MTSET/-DTT, p=0.0071; Ctrl(-MTSET/-DTT) *vs* +MTSET/+DTT, p=0.9941; +MTSET/-DTT *vs* +MTSET/+DTT, p=0.0086 |
| SFig.3C | one-way ANOVA with post-hoc Dunnett's multiple comparisons test | F (2, 18) = 0.1875; p=0.8306 | Day 1: IMQ+Saline *vs* IMQ+PAP-1, p=0.8187; IMQ+Saline *vs* IMQ+MPiN, p>0.9999 |
| F (2, 18) = 5.600; p=0.0129 | Day 2: IMQ+Saline *vs* IMQ+PAP-1, p=0.4568; IMQ+Saline *vs* IMQ+MPiN, p=0.0077 |
| F (2, 18) = 3.308; p=0.0598 | Day 3: IMQ+Saline *vs* IMQ+PAP-1, p=0.1004; IMQ+Saline *vs* IMQ+MPiN, p=0.0521 |
| F (2, 18) = 6.882; p=0.0060 | Day 4: IMQ+Saline *vs* IMQ+PAP-1, p=0.0352; IMQ+Saline *vs* IMQ+MPiN, p=0.0039 |
| F (2, 18) = 11.95; p=0.0005 | Day 5: IMQ+Saline *vs* IMQ+PAP-1, p=0.0193; IMQ+Saline *vs* IMQ+MPiN, p=0.0003 |
| F (2, 18) = 6.650; p=0.0069 | Day 6: IMQ+Saline *vs* IMQ+PAP-1, p=0.0438; IMQ+Saline *vs* IMQ+MPiN, p=0.0042 |
| F (2, 18) = 9.904; p=0.0013 | Day 7: IMQ+Saline *vs* IMQ+PAP-1, p=0.0017; IMQ+Saline *vs* IMQ+MPiN, p=0.0029 |
| F (2, 18) = 11.15; p=0.0007 | Day 8: IMQ+Saline *vs* IMQ+PAP-1, p=0.0104; IMQ+Saline *vs* IMQ+MPiN, p=0.0004 |
| F (2, 18) = 14.39; p=0.0002 | Day 9: IMQ+Saline *vs* IMQ+PAP-1, p=0.0040; IMQ+Saline *vs* IMQ+MPiN, p=0.0001 |
| SFig.3D | one-way ANOVA with Tukey's multiple comparisons test | F (3, 24) = 41.68, p<0.0001 | IMQ+Saline *vs* Normal, p <0.0001; IMQ+Saline *vs* IMQ+PAP-1, p=0.0030; IMQ+Saline *vs* IMQ+MPiN, p=0.0026 |
| SFig.3E | one-way ANOVA with post-hoc Dunnett's multiple comparisons test | F (2, 18) = 1.313; p=0.2937 | Day 2: IMQ+Saline *vs* IMQ+PAP-1, p=0.4777; IMQ+Saline *vs* IMQ+MPiN, p=0.2199 |
| F (2, 18) = 2.581; p=0.1034 | Day 3: IMQ+Saline *vs* IMQ+PAP-1, p=0.3478; IMQ+Saline *vs* IMQ+MPiN, p=0.0652 |
| F (2, 18) = 1.357; p=0.2825 | Day 4: IMQ+Saline *vs* IMQ+PAP-1, p=0.7412; IMQ+Saline *vs* IMQ+MPiN, p=0.2039 |
| F (2, 18) = 2.516; p=0.1087 | Day 5: IMQ+Saline *vs* IMQ+PAP-1, p=0.0805; IMQ+Saline *vs* IMQ+MPiN, p=0.2109 |
| F (2, 18) = 5.793; p=0.0114 | Day 6: IMQ+Saline *vs* IMQ+PAP-1, p=0.0068; IMQ+Saline *vs* IMQ+MPiN, p=0.0699 |
| F (2, 18) = 4.336; p=0.0290 | Day 7: IMQ+Saline *vs* IMQ+PAP-1, p=0.0310; IMQ+Saline *vs* IMQ+MPiN, p=0.0444 |
| F (2, 18) = 8.704; p=0.0023 | Day 8: IMQ+Saline *vs* IMQ+PAP-1, p=0.0093; IMQ+Saline *vs* IMQ+MPiN, p=0.0019 |
| F (2, 18) = 45.78; p<0.0001 | Day 9: IMQ+Saline *vs* IMQ+PAP-1, p<0.0001; IMQ+Saline *vs* IMQ+MPiN, p<0.0001 |
| SFig.3F | one-way ANOVA with post-hoc Dunnett's multiple comparisons test | F (2, 18) = 9.000; p=0.0020 | Day 2: IMQ+Saline *vs* IMQ+PAP-1, p=0.0858; IMQ+Saline *vs* IMQ+MPiN, p=0.0010 |
| F (2, 18) = 1.387; p=0.2753 | Day 3: IMQ+Saline *vs* IMQ+PAP-1, p=0.3350; IMQ+Saline *vs* IMQ+MPiN, p=0.2389 |
| F (2, 18) = 9.270; p=0.0017 | Day 4: IMQ+Saline *vs* IMQ+PAP-1, p=0.0240; IMQ+Saline *vs* IMQ+MPiN, p=0.0010 |
| F (2, 18) = 10.52; p=0.0009 | Day 5: IMQ+Saline *vs* IMQ+PAP-1, p=0.0032; IMQ+Saline *vs* IMQ+MPiN, p=0.0010 |
| F (2, 18) = 15.44; p=0.0001 | Day 6: IMQ+Saline *vs* IMQ+PAP-1, p=0.0014; IMQ+Saline *vs* IMQ+MPiN, p<0.0001 |
| F (2, 18) = 21.37; p<0.0001 | Day 7: IMQ+Saline *vs* IMQ+PAP-1, p<0.0001; IMQ+Saline *vs* IMQ+MPiN, p<0.0001 |
| F (2, 18) = 20.18; p<0.0001 | Day 8: IMQ+Saline *vs* IMQ+PAP-1, p =0.0002; IMQ+Saline *vs* IMQ+MPiN, p<0.0001 |
| F (2, 18) = 35.88; p<0.0001 | Day 9: IMQ+Saline *vs* IMQ+PAP-1, p<0.0001; IMQ+Saline *vs* IMQ+MPiN, p<0.0001 |
| SFig.3G | one-way ANOVA with post-hoc Dunnett's multiple comparisons test | F (2, 18) = 11.16; p=0.0007 | Day 2: IMQ+Saline *vs* IMQ+PAP-1, p=0.1843; IMQ+Saline *vs* IMQ+MPiN, p=0.0004 |
| F (2, 18) = 6.836; p=0.0062 | Day 3: IMQ+Saline *vs* IMQ+PAP-1, p=0.6351; IMQ+Saline *vs* IMQ+MPiN, p=0.0045 |
| F (2, 18) = 25.93; p<0.0001 | Day 4: IMQ+Saline *vs* IMQ+PAP-1, p=0.0039; IMQ+Saline *vs* IMQ+MPiN, p<0.0001 |
| F (2, 18) = 11.08; p=0.0007 | Day 5: IMQ+Saline *vs* IMQ+PAP-1, p=0.0070; IMQ+Saline *vs* IMQ+MPiN, p=0.0005 |
| F (2, 18) = 2.774; p=0.0891 | Day 6: IMQ+Saline *vs* IMQ+PAP-1, p=0.5959; IMQ+Saline *vs* IMQ+MPiN, p=0.0572 |
| F (2, 18) = 23.25; p<0.0001 | Day 7: IMQ+Saline *vs* IMQ+PAP-1, p=0.0001; IMQ+Saline *vs* IMQ+MPiN, p<0.0001 |
| F (2, 18) = 18.12; p<0.0001 | Day 8: IMQ+Saline *vs* IMQ+PAP-1, p=0.0066; IMQ+Saline *vs* IMQ+MPiN, p<0.0001 |
| F (2, 18) = 25.07; p<0.0001 | Day 9: IMQ+Saline *vs* IMQ+PAP-1, p=0.0001; IMQ+Saline *vs* IMQ+MPiN, p<0.0001 |
| SFig.5C | one-way ANOVA with Tukey's multiple comparisons test | F (5, 36) = 0.2704, p=0.9263 | + 10 mV *vs* + 20 mV, p=0.9986; + 10 mV *vs* + 30 mV, p=0.9911; + 10 mV *vs* + 40 mV, p=0.9701; + 10 mV *vs* + 50 mV, p=0.9384; + 10 mV *vs* + 60 mV, p=0.9225; + 20 mV *vs* + 30 mV, p>0.9999; + 20 mV *vs* + 40 mV, p=0.9989; + 20 mV *vs* + 50 mV, p=0.9948; + 20 mV *vs* + 60 mV, p=0.9918; + 30 mV *vs* + 40 mV, p>0.9999;+ 30 mV *vs* + 50 mV, p= 0.9994; + 30 mV *vs* + 60 mV, p=0.9988; + 40 mV *vs* + 50 mV, p>0.9999; + 40 mV *vs* + 60 mV, p>0.9999; + 50 mV *vs* + 60 mV, p>0.9999 |
| SFig.5D(left panel) | paired t test | t (5)=3.313 | Va: Ctrl *vs* 5 µM MPiN, p=0.0212 |
| SFig.5D(right panel) | paired t test | t (5)=1.848 | Ka: Ctrl *vs* 5 µM MPiN, p=0.1239 |
|  |  |  |  |
| SFig.5G(left panel) | unpaired t test | t (20)=2.211 | Va: Ctrl *vs* 20 µM MPiN,  p=0.0389 |
| SFig.5G(right panel) | unpaired t test | t (20)=0.7034 | Ka: Ctrl *vs* 20 µM MPiN,  p=0.4899 |
| SFig.5H | paired t test | Activation: t (6)=0.8693; Deactivation: t (6)=0.4247 | Activation: Ctrl *vs* 1 µM MPiN, p=0.4181; Deactivation: Ctrl *vs* 1 µM MPiN, p=0.6859 |
| SFig.6A | unpaired t test | 0 mV: t (15)=2.294; +20 mV: t (15)=2.605; +40 mV: t (15)=2.661; +60 mV: t (15)=2.571 | 0 mV: Ctrl *vs* 200 pM ShK, p=0.0367; + 20 mV: Ctrl *vs* 200 pM ShK, p=0.0199; + 40 mV: Ctrl *vs* 200 pM ShK, p=0.0178; + 60 mV: Ctrl *vs* 200 pM ShK, p=0.0213 |
| SFig.6B | unpaired t test | 0 mV: t (18)=2.894; +20 mV: t (18)=3.145; +40 mV: t (18)=3.218; +60 mV: t (18)=3.232 | 0 mV: Ctrl *vs* 350 nM PAP-1, p=0.0097; + 20 mV: Ctrl *vs* 350 nM PAP-1, p=0.0056; + 40 mV: Ctrl *vs* 350 nM PAP-1，p=0.0048; + 60 mV: Ctrl *vs* 350 nM PAP-1, p=0.0046 |
| SFig.6C | unpaired t test | 0 mV: t (14)=2.465; +20 mV: t (14)=2.832; +40 mV: t (14)=3.003; +60 mV: t (14)=3.052 | 0 mV: Ctrl *vs* 10 nM ADWX-1, p=0.0273; + 20 mV: Ctrl *vs* 10 nM ADWX-1, p=0.0133; + 40 mV: Ctrl *vs* 10 nM ADWX-1, p=0.0095; + 60 mV: Ctrl *vs* 10 nM ADWX-1; p=0.0086 |
| SFig.6D | unpaired t test | 0 mV: t (18)=3.850; +20 mV: t (18)=3.927; +40 mV: t (18)=3.703; +60 mV; t (18)=3.458 | 0 mV: Ctrl *vs* 200 µM Verapamil, p=0.0012; + 20 mV: Ctrl *vs* 200 µM Verapamil, p=0.0010; + 40 mV: Ctrl *vs* 200 µM Verapamil, p=0.0016; + 60 mV: Ctrl *vs* 200 µM Verapamil, p=0.0028 |
| SFig.6E | unpaired t test | 0 mV: t (16)=3.718; +20 mV: t (16)=4.124; +40 mV: t (16)=4.078; +60 mV: t (16)=4.050 | 0 mV: Ctrl *vs* 25 mM TEA-Cl, p=0.0019; + 20 mV: Ctrl *vs* 25 mM TEA-Cl, p=0.0008; + 40 mV: Ctrl *vs* 25 mM TEA-Cl，p=0.0009; + 60 mV: Ctrl *vs* 25 mM TEA-Cl, p=0.0009 |
| SFig.6F | unpaired t test | 0 mV: t (14)=3.092; +20 mV: t (14)=3.870; +40 mV: t (14)=4.115; +60 mV: t (14)=4.187 | 0 mV: Ctrl *vs* 1 mM TEA-Cl, p=0.0080; + 20 mV: Ctrl *vs* 1 mM TEA-Cl, p=0.0017; + 40 mV: Ctrl *vs* 1 mM TEA-Cl, p=0.0011; + 60 mV: Ctrl *vs* 1 mM TEA-Cl, p=0.0009 |
| SFig.6I | unpaired t test | 0 mV: t (18)=3.235; +20 mV: t (18)=4.262; +40 mV: t (18)=2.742; +60 mV: t (18)=3.094 | 0 mV: Ctrl *vs* 10 µM MPiN, p=0.0046; + 20 mV: Ctrl *vs* 10 µM MPiN, p=0.0005; + 40 mV: Ctrl *vs* 10 µM MPiN, p=0.0134; + 60 mV: Ctrl *vs* 10 µM MPiN，p=0.0063 |
| SFig.12E | one-way ANOVA with post-hoc Dunnett's multiple comparisons test | F (14, 66) = 34.68, p<0.0001 | WT *vs* F306A, p=0.0699; WT *vs* I402A, p=0.5930; WT *vs* F403A, p=0.0103; WT *vs* V409A/I410A, p<0.0001; WT *vs* V416A, p=0.6494; WT *vs* A419C, p=0.8321; WT *vs* G427A, p<0.0001; WT *vs* D433A, p<0.0001; WT *vs* A434C, p=0.9999; WT *vs* F435A, p=0.9996; WT *vs* G456A, p=0.9996; WT *vs* S462A, p=0.8181; WT *vs* A465C, p=0.9995; WT *vs* L474A, p=0.3150 |
| SFig.13A | unpaired t test | 0 mV: t (16)=3.891, p=0.0013; +20 mV: t (16)=4.028; +40 mV: t (16)=3.858; +60 mV：t (16)=3.628 | 0 mV: Ctrl *vs* 1 µM ADWX-1, p=0.0013; + 20 mV: Ctrl *vs* 1 µM ADWX-1, p=0.0010; + 40 mV: Ctrl *vs* 1 µM ADWX-1, p=0.0014; + 60 mV: Ctrl *vs* 1 µM ADWX-1; p=0.0023 |
